# Supplementary material for: Multiomics analysis of naturally efficacious lipid nanoparticle coronas reveals high-density lipoprotein is necessary for their function
Source: Nat Commun. 2023 Jul 6;14:4007. doi: 10.1038/s41467-023-39768-9 (PMC10325984; doi:10.1038/s41467-023-39768-9)
Supplement: Supplementary file 3 — Supplementary_Data_1 [file 41467_2023_39768_MOESM3_ESM.xlsx]

## Sheet: Plasma Biomarkers
Plasma ID	Group	ALAT (µkat/L)	BeHY (µM)	Cholesterol (mM)	Fructosamine (µM)	Glucose (mM)	Haptoglobine (g/L)	Lactate (mM)	NEFA (mM)	Protein (g/L)	Triglycerides (mM)	Albumin g/L	Insulin (ng/mL)
1	Lean	0.96	283.62	1.75	130.83	7.7	2.121	5.64	0.433	54.4	1.37	27.1	0.710547
2		0.89	251.68	2.31	133.17	9.51	1.691	3.2	0.386	52.1	1.36	26.06	0.945083
3		0.87	432.26	1.73	136.54	8.77	2.27	2.18	0.408	52.1	0.96	25.61	0.608259
4		0.72	192.54	1.86	125.27	9.36	1.393	2.71	0.213	49.6	0.98	25.19	0.80251
5		0.75	243.95	2.07	136.41	10.33	2.211	3.43	0.337	56.1	1.35	26.42	0.581744
6		0.9	170.43	1.93	154.3	9.01	2.214	6.59	0.273	55.2	1.48	26.19	0.699574
7		0.74	234.95	2.02	98.54	9.26	1.975	3.86	0.391	55.2	2.43	26.5	0.948624
8		0.8	319.82	1.6	136.27	9.27	1.796	5.36	0.344	53.3	1.63	27.32	1.02833
mean		0.82875	266.156	1.90875	131.416	9.15125	1.95887	4.12125	0.348125	53.5	1.445	26.2987	0.790583
9	Obese	1.33	*	5.82	139.18	8.13	2.01	5.82	0.536	70.9	16.12	23.45	5.5692
10		1.25	69.34	4.24	147.52	11.21	1.684	7.04	0.833	70.5	11.45	30.41	4.98143
11		1.33	173.07	6.1	133.69	10.15	3.326	10.78	0.347	66.7	5.4	25.16	16.4998
12		1.15	106.44	4.1	144.01	14.5	2.608	4.75	0.34	59.6	5.29	25.18	4.4
13		1.1	*	4.77	116.01	11.37	2.057	6.84	0.606	108.5	6.65	24.75	8.68941
14		2.07	*	3.34	119.9	9.18	2.856	6.73	0.689	104.9	5.39	26.82	13.9574
15		1.35	*	5.87	133.44	10.6	2.423	5.98	0.694	63.7	13.59	24.23	6.78282
16		1.33	131.68	5.86	129.89	11.19	2.476	6.43	0.743	59.9	9.6	24.53	13.6219
mean		1.36375	120.133	5.0125	132.955	10.7912	2.43	6.79625	0.5985	75.5875	9.18625	25.5662	9.31274
ratio obese/lean		1.64555	0.451361	2.62606	1.01171	1.17921	1.24051	1.64907	1.71921	1.41285	6.35727	0.972147	11.7796
*Below detect limitation
NEFA = non-essential fatty acids
BeHY = beta-hydroxybutyrate
ALAT = alanine aminotransferase

## Sheet: Plasma Lipid composition
Phosphatidylcholine (PC)
Plasma ID	Group	PC 32:0	PC 32:1	PC 34:0	PC 34:1	PC 34:2	PC 34:3	PC 36:0	PC 36:1	PC 36:2	PC 36:3	PC 36:4	PC 36:5	PC 38:1	PC 38:2	PC 38:3	PC 38:4	PC 38:5	PC 38:6	PC 38:7	PC 40:1	PC 40:2	PC 40:3	PC 40:4	PC 40:5	PC 40:6	PC 40:7	PC 40:8	Total
1	Lean	2.39265	3.43008	2.66931	24.1282	27.9754	1.24942	0.59636	5.83299	16.1533	9.46882	25.1828	1.01678	0.102351	0.676923	5.26364	22.8194	8.19806	6.39407	0.202898	0.0117112	0.0169349	0.098593	0.651091	2.62826	4.05372	1.06653	0.926936	173.207
2		3.36197	5.43684	3.2675	29.1326	34.6498	1.56727	0.858695	7.14186	21.5322	11.773	29.3484	1.26481	0.155767	0.975521	6.90761	27.5358	8.65786	7.13874	0.267238	0.0198167	0.0320662	0.124432	0.800411	3.12846	4.99208	1.14073	0.994053	212.206
3		2.32156	2.24613	2.6515	23.3848	29.0201	1.06864	0.592574	5.48476	16.148	9.17768	26.3702	0.81007	0.134946	0.657028	5.07424	24.5549	8.78198	6.91359	0.173577	0.0183404	0.0245476	0.102616	0.79098	2.92707	4.1428	0.965045	0.855902	175.394
4		2.86477	3.17151	2.88252	25.3165	35.7392	1.34553	0.67232	5.65024	19.5819	10.6251	30.5493	1.07252	0.112978	0.69536	5.01926	26.0634	9.06355	7.48577	0.227097	0.0142059	0.0311861	0.0982607	0.706674	2.62986	4.32203	1.10853	1.23766	198.287
5		3.24542	3.73479	2.89025	24.8921	34.1716	1.5178	0.65758	5.51606	18.2268	11.3545	33.5767	1.2193	0.128898	0.722915	5.5387	27.995	10.0052	7.77012	0.238558	0.0102959	0.0330231	0.11572	0.896295	3.06575	4.85601	1.24932	1.19442	204.823
6		3.10163	4.5007	3.13634	27.1403	35.0616	1.54802	0.719333	6.58877	19.9215	11.2575	30.391	1.10879	0.122515	0.846771	6.01057	27.2883	9.26946	7.59542	0.203655	0.0142965	0.0153191	0.122704	0.749877	3.00282	4.70621	1.10884	1.00415	206.536
7		2.62626	4.54237	3.2546	26.3414	27.9024	1.21541	0.81874	7.76243	20.3344	10.1557	28.4155	1.16375	0.114874	0.938282	7.50356	30.7752	8.24112	7.20501	0.204564	0.0154779	0.0251249	0.128763	0.948859	3.6713	5.82604	1.172	1.15519	202.458
8		2.76245	3.56269	2.63358	24.1379	32.8283	1.41684	0.621789	5.60109	17.8355	10.7042	30.5614	1.14372	0.113705	0.659017	5.28054	26.0377	8.74622	7.58058	0.214151	0.0118238	0.0304095	0.102316	0.689578	2.4028	4.3868	1.23838	1.23695	192.541
Pooled		2.66943	3.40951	2.85913	24.2169	30.775	1.27951	0.623951	5.95389	17.2863	10.1714	28.8659	1.01487	0.116809	0.701038	5.60063	26.9739	9.00245	7.50164	0.17722	0.0087616	0.0286961	0.11414	0.759811	2.91958	4.53015	1.17599	1.13168	189.868
mean		2.83459	3.82814	2.9232	25.5592	32.1686	1.36612	0.692174	6.19728	18.7167	10.5646	29.2994	1.09997	0.123254	0.771477	5.82477	26.6337	8.87043	7.26041	0.216467	0.014496	0.0260764	0.111676	0.779221	2.93204	4.66071	1.13117	1.07566	195.681
9	Obese	10.8166	20.9776	13.0111	91.3028	49.9164	2.93479	4.35019	32.1325	51.4409	25.6279	65.3728	3.21679	0.369121	4.04988	32.3298	89.7574	17.4105	19.9021	0.743119	0.0344327	0.0826849	0.39107	3.25055	16.9191	24.9811	5.09465	7.27273	593.689
10		5.11879	12.1801	7.61187	56.011	38.8413	2.4556	3.25582	23.1262	43.8723	21.6822	49.2833	2.55228	0.329459	3.5293	30.531	81.2881	15.9546	17.9913	0.615087	0.0229303	0.0441738	0.282676	2.42094	12.6117	21.2634	3.98637	3.8597	460.722
11		9.7497	15.2808	10.3388	75.0581	47.3674	2.02178	3.4335	23.4041	44.2168	27.0484	70.6534	2.68559	0.418009	3.70307	28.7424	89.3874	18.8274	20.2827	0.643711	0.0358424	0.0692365	0.364345	2.90682	15.0064	20.2298	3.50009	3.95189	539.328
12		6.89585	12.7507	7.4883	56.2617	44.3358	1.89158	2.53578	18.7252	42.4872	22.4347	52.6823	2.21358	0.40456	3.62439	28.0035	77.9802	14.941	17.0946	0.563358	0.0228343	0.0708232	0.378531	2.9094	14.724	22.5956	3.24119	3.41095	460.668
13		13.3756	21.4575	15.3748	91.4801	60.2636	2.97402	5.29278	40.4995	70.4836	29.8949	68.6162	2.49414	0.475106	4.4281	34.7673	87.3469	15.0557	16.9506	0.584587	0.0315551	*	0.360802	3.6808	22.3811	22.8963	3.97	6.0665	641.202
14		12.6126	25.0233	14.6285	109.786	63.3649	3.96314	5.22035	38.312	81.4984	37.9551	80.2031	2.97682	0.66719	5.09298	41.5493	101.012	15.9929	17.29	0.496659	0.0433541	0.0670389	0.393042	4.30649	25.2792	27.4852	4.59315	7.84293	727.656
15		10.9556	19.4333	13.3711	94.4216	50.4188	2.58457	4.68968	29.8849	52.1606	26.9853	77.371	3.16022	0.518646	3.86937	32.614	112.326	20.9455	22.8857	0.863968	0.0406556	0.0786629	0.419906	3.82954	21.2969	28.0405	4.98193	7.12773	645.276
16		12.6266	19.0939	12.8929	86.7729	51.8779	2.30856	3.77777	24.9373	45.7403	27.1944	84.6681	2.77665	0.446264	2.76792	26.5395	102.826	19.3792	22.4362	0.636242	0.0449511	0.0937263	0.339154	3.32848	18.6977	24.2395	3.45968	5.13359	605.035
Pooled		8.53811	15.039	9.88498	71.8967	47.1437	2.40799	3.5683	24.3909	46.8794	23.9226	62.8271	2.70384	0.420279	3.38675	28.5851	91.567	16.1154	18.3551	0.610991	0.0241796	0.0800619	0.356533	3.1504	17.8032	23.3444	3.75142	5.47622	532.23
mean		10.2689	18.2747	11.8397	82.6368	50.7983	2.64175	4.06948	28.8777	53.9875	27.3529	68.6063	2.75951	0.453544	3.88313	31.8846	92.7405	17.3134	19.3541	0.643341	0.0345695	0.0723352	0.366191	3.32913	18.3645	23.9664	4.10338	5.58325	584.197
ratio obese/lean		3.62272	4.77377	4.05025	3.23315	1.57913	1.93377	5.87928	4.65975	2.88446	2.58911	2.34156	2.50872	3.67975	5.03337	5.47397	3.48207	1.95181	2.66571	2.972	2.38475	2.77397	3.27906	4.27238	6.2634	5.14222	3.62755	5.19055	2.98545
*Below limit of detection
Lysophosphatidylcholine (LPC)
Plasma ID	Group	LPC 16:0	LPC 16:1	LPC 18:0	LPC 18:1	LPC 18:2	LPC 18:3	LPC 20:0	LPC 20:1	LPC 20:2	LPC 20:3	LPC 20:4	LPC 20:5	LPC 22:0	LPC 22:2	LPC 22:1	LPC 22:3	LPC 22:4	LPC 22:5	LPC 22:6	Total
1	Lean	161.624	12.7775	108.142	69.2761	52.4312	0.81551	0.76241	1.97851	1.43171	7.84441	58.1687	0.212645	0.332181	0.0242035	0.163003	0.110398	0.709311	6.31761	6.31761	489.439
2		167.357	14.644	123.003	70.5062	59.9051	1.1679	0.899162	2.93639	1.30251	8.56534	54.4749	0.408037	0.464004	0.0266272	0.314349	0.123767	0.752959	6.11218	6.11218	519.076
3		125.526	7.15502	99.9564	51.9503	39.8637	0.569882	0.604331	2.15281	1.04257	5.11885	47.049	0.11122	0.302657	0.027313	0.156496	0.081939	0.66314	4.93701	4.93701	392.206
4		182.942	13.1355	135.098	82.772	74.132	0.908985	0.819424	2.60279	1.71969	8.57808	74.9253	0.258796	0.528351	0.0820006	0.232917	0.100901	1.10497	7.58796	7.58796	595.117
5		142.992	10.731	97.014	60.6172	56.4599	0.807187	0.869163	1.97116	1.37142	7.45384	61.0071	0.158597	0.332688	0.0466968	0.178395	0.0873682	1.0028	6.9434	6.9434	456.987
6		162.993	12.3528	116.322	66.6232	57.1297	0.729337	0.650383	2.04542	1.24584	7.3417	54.3134	0.377872	0.363876	0.0314233	0.163718	0.0963824	0.68207	6.06575	6.06575	495.594
7		165.224	14.2179	136.954	70.3019	57.0409	0.732276	0.614774	1.52479	1.37357	9.41993	60.1448	0.273426	0.266237	0.0396629	0.126921	0.1118	0.886217	7.43629	7.43629	534.126
8		155.484	12.3866	99.5291	64.8403	58.2165	0.655828	0.620217	1.55054	1.2944	7.18845	60.0714	0.186463	0.352798	0.0183588	0.188896	0.0913515	0.754921	6.02146	6.02146	475.473
Pooled		151.387	11.1616	102.38	61.0467	53.231	0.818845	0.70961	1.81614	1.30582	6.72962	52.5095	0.253075	0.381905	0.0366896	0.181989	0.0579529	0.922243	5.90619	5.90619	456.742
mean		158.018	12.175	114.502	67.1109	56.8974	0.798363	0.729983	2.0953	1.34772	7.68882	58.7693	0.248382	0.367849	0.0370358	0.190587	0.100488	0.819549	6.42771	6.42771	494.752
9	Obese	381.21	47.7407	442.173	171.419	120.956	3.01978	1.28965	3.48216	4.70823	57.6061	177.71	1.24196	1.45991	0.179795	0.608619	0.853055	5.29671	39.7234	39.7234	1500.4
10		216.967	25.4382	288.912	101.975	65.6001	1.18509	1.13734	2.77109	2.53466	25.4127	92.0664	0.638326	0.712884	0.0346632	0.254088	0.248528	1.66024	19.7181	19.7181	866.985
11		298.436	26.3605	327.024	115.331	64.9358	1.17214	0.902923	2.59329	2.66438	27.327	102.652	0.347167	0.868639	0.0588235	0.390112	0.369181	2.32588	16.8744	16.8744	1007.51
12		194.86	18.3003	228.253	66.4894	51.5966	0.886561	0.784004	1.41839	1.90125	18.4075	65.2924	0.60555	0.552231	0.0277476	0.147443	0.21654	1.41785	10.9026	10.9026	672.962
13		314.411	23.0497	459.202	119.711	78.8936	1.70008	1.21312	2.32152	3.27058	36.9405	140.115	0.711491	1.80766	0.091687	0.313366	0.4674	3.41606	23.9727	23.9727	1235.58
14		325.072	22.6563	433.072	100.069	81.6747	1.68746	1.22785	2.54075	2.64316	33.6779	163.147	0.67966	1.21368	0.0499646	0.307583	0.572998	3.91814	30.7176	30.7176	1235.65
15		314.724	24.4269	429.09	128.617	68.6559	1.15771	1.39665	3.02668	2.79769	31.0593	146.675	0.406611	0.915173	0.0911987	0.375946	0.486659	3.24811	27.4253	27.4253	1212
16		358.333	24.9615	415.85	111.838	61.8281	0.912403	1.158	2.30618	2.0569	22.6246	133.909	0.326648	1.71388	0.0740892	0.386819	0.443717	2.78592	23.9971	23.9971	1189.5
Pooled		376.964	33.3864	449.518	134.357	88.9976	1.8206	1.36605	2.93956	3.67311	38.4478	145.741	0.842843	1.07689	0.0541586	0.401838	0.597679	3.00822	28.0203	28.0203	1339.23
mean		300.502	26.6168	377.947	114.431	74.2676	1.46515	1.13869	2.55751	2.82211	31.632	127.696	0.619677	1.15551	0.0759961	0.347997	0.45726	3.00861	24.1664	24.1664	1115.07
ratio obese/lean		1.9017	2.18618	3.30078	1.70511	1.30529	1.8352	1.55989	1.22059	2.09399	4.11402	2.17283	2.49485	3.14125	2.05197	1.82592	4.55037	3.67106	3.75972	3.75972	2.2538
Phosphatidylethanolamine (PE)
Plasma ID	Group	PE 34:0	PE 34:1	PE 34:2	PE 34:3	PE 36:0	PE 36:1	PE 36:2	PE 36:3	PE 36:4	PE 36:5	PE 38:0	PE 38:1	PE 38:2	PE 38:3	PE 38:4	PE 38:5	PE 38:6	PE 38:7	PE 40:0	PE 40:1	PE 40:2	PE 40:3	PE 40:5	PE 40:6	PE 40:7	PE 40:8	Total
1	Lean	0.0263393	0.0227679	0.0339286	0.0339286	0.01875	0.0165179	0.0580357	0.0178571	0.0428571	0.0200893	0.015625	0.0133929	0.0174107	0.0258929	0.171875	0.0794643	0.0986607	0.0303571	0.0151786	0.0165179	0.0133929	0.0174107	0.0111607	0.06875	0.0517857	0.0258929	0.963839
2		0.0218688	0.0313121	0.0313121	0.0313121	0.0218688	0.0387674	0.118787	0.0303181	0.0333002	0.0308151	0.0139165	0.0144135	0.0218688	0.0173956	0.307157	0.0536779	0.082008	0.0974155	0.0178926	0.0159046	0.0193837	0.0173956	0.0218688	0.0472167	0.0576541	0.0198807	1.21471
3		0.0196312	0.0243902	0.0285544	0.0285544	0.0208209	0.0232005	0.0773349	0.0279595	0.0327186	0.0380726	0.0208209	0.0226056	0.015467	0.0202261	0.0933968	0.0350982	0.046401	0.0481856	0.0226056	0.0148721	0.015467	0.0124926	0.0196312	0.0422368	0.0422368	0.0398572	0.832838
4		0.0265188	0.0289296	0.0279653	0.0289296	0.021215	0.0207329	0.0424301	0.0207329	0.0535198	0.0294118	0.0159113	0.0135005	0.0197686	0.0173578	0.0549662	0.0289296	0.0790743	0.048216	0.0144648	0.0135005	0.012054	0.0163934	0.0183221	0.0183221	0.0568949	0.0216972	0.749759
5		0.0179791	0.0320029	0.0248112	0.0248112	0.0111471	0.0169004	0.0503416	0.032722	0.0722762	0.0981661	0.0147429	0.0136641	0.0169004	0.0165408	0.195973	0.0693995	0.0352391	0.0503416	0.0165408	0.0136641	0.0154621	0.0147429	0.0204962	0.045667	0.0453074	0.0140237	0.979863
6		0.0264117	0.026867	0.0373406	0.0373406	0.0195811	0.0277778	0.0596539	0.03051	0.0878871	0.0295993	0.0195811	0.0163934	0.0136612	0.0405282	0.133424	0.123406	0.0295993	0.124772	0.0141166	0.0136612	0.0163934	0.0177596	0.0241348	0.0642077	0.104736	0.0159381	1.15528
7		0.0255624	0.0521472	0.0342536	0.0347648	0.0199387	0.0460123	0.0746421	0.0224949	0.0889571	0.0383436	0.0235174	0.0194274	0.0148262	0.0332311	0.252045	0.100204	0.0915133	0.0966258	0.0209611	0.0163599	0.0168712	0.0148262	0.0214724	0.0567485	0.0976483	0.0368098	1.3502
8		0.0394558	0.0537415	0.055102	0.055102	0.0258503	0.0278912	0.0863946	0.0292517	0.144218	0.0544218	0.0244898	0.0292517	0.0217687	0.0285714	0.338776	0.0666667	0.138776	0.108163	0.0163265	0.0265306	0.0319728	0.0183673	0.0380952	0.0462585	0.118367	0.0557823	1.67959
Pooled		0.029036	0.0313589	0.0336818	0.0336818	0.0197445	0.0360046	0.0929152	0.0691057	0.0714286	0.0452962	0.0127758	0.0209059	0.0168409	0.0214866	0.287456	0.121951	0.103368	0.0720093	0.0168409	0.0209059	0.0238095	0.0191638	0.0238095	0.0209059	0.0900116	0.0168409	1.35134
mean		0.0254709	0.0340198	0.0341585	0.0343429	0.0198965	0.027225	0.0709525	0.0264808	0.0694667	0.0423649	0.0185756	0.0178311	0.0177089	0.024968	0.193452	0.0696059	0.0751589	0.0755097	0.0172608	0.0163764	0.0176246	0.0161735	0.0218977	0.0486759	0.0718288	0.0287352	1.11576
9	Obese	0.0407315	0.084788	0.0482128	0.0482128	0.0253533	0.0586035	0.140482	0.0852037	0.113882	0.0586035	0.0344971	0.0274314	0.042394	0.240648	0.694514	0.257273	0.231089	0.113466	0.0286783	0.0257689	0.0261845	0.0299252	0.174148	0.330008	0.246467	0.0548628	3.26143
10		0.0705563	0.118046	0.0807327	0.0807327	0.0454545	0.0956581	0.303256	0.147897	0.225916	0.0861601	0.07327	0.0454545	0.0488467	0.28019	1.5	0.517639	0.567843	0.194708	0.0407056	0.0305292	0.0502035	0.0373134	0.13772	0.585482	0.261872	0.0719132	5.6981
11		0.0442018	0.0852834	0.0634425	0.0634425	0.0390016	0.0546022	0.157046	0.0577223	0.25585	0.0421217	0.050962	0.0369215	0.0374415	0.0592824	0.560582	0.222569	0.214769	0.117525	0.0327613	0.0374415	0.0395216	0.0364015	0.0920437	0.340094	0.104524	0.0374415	2.883
12		0.0429043	0.0679868	0.0587459	0.0587459	0.0389439	0.0587459	0.113531	0.0409241	0.10429	0.0435644	0.0349835	0.0382838	0.0336634	0.116832	0.385479	0.0943894	0.211221	0.10297	0.0363036	0.030363	0.0237624	0.0277228	0.0963696	0.267327	0.10429	0.0389439	2.27129
13		0.0450145	0.201839	0.0609874	0.0605034	0.0435624	0.139884	0.434656	0.127299	0.303969	0.0595353	0.0382381	0.0377541	0.0759923	0.24879	1.3456	0.429332	0.563408	0.147628	0.0285576	0.0411423	0.0300097	0.0367861	0.391578	0.713456	0.1394	0.0421104	5.78703
14		0.0558839	0.0827512	0.0789898	0.0806018	0.0467491	0.110693	0.451908	0.090274	0.442235	0.0456744	0.0569586	0.0515852	0.043525	0.401397	1.94197	0.430414	0.530897	0.0795271	0.0365395	0.0440623	0.0360021	0.059108	0.331542	0.606126	0.265449	0	6.40086
15		0.0835443	0.0725738	0.0843882	0.0843882	0.0540084	0.0658228	0.113924	0.140084	0.185654	0.0742616	0.0447257	0.049789	0.116456	0.254852	1.55865	0.437975	0.831224	0.186498	0.0464135	0.0472574	0.0481013	0.0455696	0.606751	0.891983	0.450633	0.0995781	6.67511
16		0.0513834	0.0909091	0.0774704	0.0774704	0.0466403	0.0616601	0.183399	0.0798419	0.319368	0.0537549	0.0561265	0.0490119	0.056917	0.0893281	1.72095	0.379447	1.02846	0.0656126	0.0411067	0.0474308	0.0363636	0.056917	0.354941	0.837945	0.364427	0.0695652	6.29644
Pooled		0.0367384	0.0524194	0.0448029	0.0448029	0.0367384	0.0362903	0.150538	0.0519713	0.104839	0.0336022	0.0228495	0.0510753	0.0237455	0.101254	0.643817	0.259409	0.341398	0.163082	0.0300179	0.0300179	0.0201613	0.0282258	0.200269	0.195341	0.15905	0.0246416	2.8871
mean		0.0542775	0.100522	0.0691212	0.0692622	0.0424642	0.0807087	0.237275	0.0961558	0.243896	0.0579595	0.0487202	0.0420289	0.0569044	0.211415	1.21347	0.34613	0.522364	0.125992	0.0363833	0.0379994	0.0362686	0.0412179	0.273137	0.571552	0.242133	0.0518019	4.90916
ratio obese/lean		2.13096	2.95481	2.02354	2.01678	2.13426	2.9645	3.34414	3.63115	3.51097	1.3681	2.62281	2.35705	3.21332	8.46744	6.27272	4.97271	6.95012	1.66855	2.10785	2.32038	2.05784	2.54848	12.4733	11.742	3.37097	1.80273	4.39983
Sphingomyelin (SM)
Plasma ID	Group	SM 34:1	SM 34:2	SM 36:1	SM 36:2	SM 38:1	SM 38:2	SM 40:1	SM 40:2	SM 42:1	SM 42:2	Total
1	Lean	3.8248	0.44939	1.16332	0.28726	0.30602	0.11918	1.7382	0.61714	3.33171	5.4631	17.3001
2		2.31838	0.18785	0.20066	0.06401	0.07737	0.04488	0.74615	0.37764	2.66248	2.90457	9.58399
3		3.08618	0.28129	0.3621	0.1176	0.13481	0.06546	0.95874	0.54016	3.09612	3.6441	12.2866
4		1.63388	0.14956	0.15146	0.05326	0.06523	0.03059	0.59269	0.3182	2.23405	2.48894	7.71786
5		2.49326	0.19696	0.22381	0.07315	0.09496	0.05558	0.86783	0.4164	2.86132	3.42357	10.7068
6		2.46407	0.19929	0.18382	0.07087	0.09166	0.05058	0.78771	0.43628	2.9194	3.16092	10.3646
7		2.24696	0.20963	0.22143	0.07497	0.08832	0.04613	0.79105	0.39248	2.49527	3.14324	9.70948
8		2.3004	0.20503	0.2408	0.06899	0.08922	0.03995	0.76497	0.29326	2.42306	2.55506	8.98074
Pooled		2.06474	0.21005	0.1835	0.06719	0.08579	0.03541	0.76485	0.32537	2.64507	2.8326	9.21457
mean		2.54599	0.234875	0.343425	0.101264	0.118449	0.0565438	0.905917	0.423945	2.75293	3.34794	10.8313
9	Obese	2.4313	0.19696	0.19866	0.06983	0.08983	0.04652	0.80549	0.38825	2.66385	3.05865	9.94934
10		5.3855	0.63323	1.49732	0.3608	0.41771	0.15835	2.40284	0.82933	4.30845	7.19597	23.1895
11		2.98756	0.35244	0.76276	0.22525	0.23869	0.1131	1.53405	0.55497	2.97524	4.36045	14.1045
12		3.97872	0.43503	1.249	0.28331	0.31714	0.1168	1.82683	0.5865	3.04023	5.16516	16.9987
13		4.60816	0.49237	1.35709	0.32584	0.37597	0.14559	2.04529	0.7546	3.51075	6.67462	20.2903
14		2.77821	0.32466	0.65657	0.16424	0.18813	0.07754	1.29669	0.47788	2.60506	4.07136	12.6403
15		3.72668	0.46416	1.05589	0.28261	0.29945	0.1143	1.82147	0.60564	3.2813	5.35504	17.0065
16		3.99052	0.42386	0.93341	0.23594	0.26579	0.10505	1.63646	0.53291	3.0981	4.57462	15.7967
Pooled		4.40863	0.52294	1.39099	0.36581	0.34021	0.13243	1.78286	0.65968	3.27098	5.41784	18.2924
mean		3.73583	0.415339	0.963838	0.243477	0.274089	0.109656	1.67114	0.59126	3.18537	5.05698	16.247
ratio obese/lean		1.46734	1.76834	2.80654	2.40439	2.31399	1.93932	1.84469	1.39466	1.15709	1.51048	1.50001
