# Supplementary material for: Multiomics analysis of naturally efficacious lipid nanoparticle coronas reveals high-density lipoprotein is necessary for their function
Source: Nat Commun. 2023 Jul 6;14:4007. doi: 10.1038/s41467-023-39768-9 (PMC10325984; doi:10.1038/s41467-023-39768-9)
Supplement: Supplementary file 4 — Supplementary_Data_2 [file 41467_2023_39768_MOESM4_ESM.xlsx]

## Sheet: PC
Plasma type	Dose (ng)	Plasma#	repeat	32:0	32:1	34:0	34:1	34:2	34:3	36:0	36:1	36:2	36:3	36:4	36:5	38:0	38:1	38:2	38:3	38:4	38:5	38:6	38:7	40:1	40:2	40:3	40:4	40:5	40:6	40:7	40:8
Lean	200	1	1	0.00343085	0.00404267	0.00435441	0.0429284	0.0452591	0.0141452	0.65881	0.00837797	0.0239699	0.0118149	0.0338632	0.000781183	0	0	0.000638242	0.00606337	0.0300899	0.00879653	0.00670442	7.84275e-05	9.86668e-05	1.86933e-05	2.7548e-05	0.000524115	0.00228494	0.00315678	0.000551944	0.000266485
Lean	200	1	2	0.00454836	0.00599526	0.00598176	0.0516574	0.0564932	0.0153723	0.982084	0.0108124	0.0277995	0.0140901	0.0463712	0.00139489	0	0.000225865	0.000739827	0.00835557	0.0380997	0.0106309	0.0083371	3.78626e-05	0	0	0.000122628	0.000652703	0.0023404	0.0041358	0.000652179	0.00036749
Lean	200	2	1	0.00325567	0.003733	0.00342565	0.0292851	0.0334328	0.0140099	0.720179	0.00654942	0.0163012	0.00804182	0.0185132	0.000473858	0.000204056	8.81969e-05	0.000639428	0.0043155	0.0164558	0.00446931	0.00385367	0.000163699	6.7484e-05	1.42986e-05	2.33855e-05	0.000342899	0.00129315	0.00182367	0.000377376	0.00012548
Lean	200	2	2	0.00447785	0.0046752	0.00496957	0.0421023	0.0477829	0.0142609	0.959772	0.00951006	0.0245185	0.0107609	0.0275304	0.000950089	0	0.000211612	0.000782149	0.00600751	0.0226901	0.00612783	0.00555297	0.000344156	1.41329e-05	5.42399e-05	7.21925e-05	0.000483321	0.00181449	0.0029506	0.000533868	0.000222689
Lean	200	3	1	0.00266642	0.00253645	0.00391102	0.0291745	0.0373489	0.0150592	0.824938	0.00631121	0.0169579	0.00931232	0.0285114	0.000577027	5.32976e-05	7.57726e-05	0.000764532	0.00454982	0.0234801	0.00712146	0.0056656	1.83652e-05	0	0	9.23398e-05	0.000480321	0.00182471	0.00211161	0.000489311	0.000159379
Lean	200	3	2	0.00267745	0.00297492	0.00441367	0.0367953	0.0419797	0.0145775	1.00387	0.00671773	0.0194027	0.00973202	0.0331957	0.000734781	9.89424e-05	0.000141383	0.000657443	0.00519371	0.0282213	0.00724568	0.00633103	0.000131028	0	3.69436e-05	3.69436e-05	0.000518489	0.00202998	0.00321448	0.000432841	0.000198907
Lean	200	4	1	0.00254122	0.00283017	0.00387386	0.0288425	0.0408199	0.0145727	0.817473	0.0054537	0.0174049	0.00871144	0.0276352	0.000628478	7.43823e-05	0.000129259	0.000451365	0.00441391	0.022171	0.00583108	0.0054238	8.64759e-05	5.35761e-05	0	9.07672e-05	0.000376723	0.00141964	0.00242276	0.000346944	0.000236281
Lean	200	4	2	0.00342279	0.00369257	0.00474676	0.0423823	0.0535439	0.0150682	1.09947	0.00750392	0.0231614	0.0115326	0.0368681	0.00119386	3.64903e-05	0.000243101	0.000726409	0.00602091	0.0290839	0.00784014	0.00722534	0.000286512	2.62982e-05	2.26492e-05	7.72589e-05	0.000650912	0.00197576	0.0030784	0.00046456	0.000336466
Lean	200	5	1	0.00318168	0.00450091	0.00401137	0.0362777	0.0478085	0.0150456	1.01248	0.00718146	0.0201223	0.0119318	0.0385195	0.00090793	8.64818e-05	0	0.000812568	0.00613094	0.0294743	0.00883839	0.00749779	0.000172964	0	1.58293e-05	0.000111577	0.000729433	0.00187171	0.00332337	0.0003781	0.000267424
Lean	200	5	2	0.0025753	0.00437463	0.00419984	0.033076	0.0453499	0.0159437	1.01672	0.00646664	0.020955	0.0110321	0.0393825	0.000932094	0.000134081	8.50301e-05	0.00128068	0.00608992	0.0296018	0.00870133	0.00787705	0.000355931	1.87987e-05	6.2123e-05	6.76008e-05	0.000630816	0.00204844	0.00325716	0.00060405	0.000357052
Lean	200	6	1	0.00366384	0.0036805	0.00396003	0.0375463	0.0543144	0.01555	0.92674	0.00665427	0.0200997	0.0120422	0.044383	0.000870139	2.79408e-05	4.69098e-05	0.000506652	0.00511496	0.0318727	0.00895106	0.00833572	0.000316705	0	6.11366e-05	5.80605e-05	0.000539719	0.00228935	0.00319538	0.000507421	0.000357335
Lean	200	6	2	0.00300685	0.00315324	0.00412983	0.0341692	0.0501153	0.0146552	0.901585	0.00650942	0.0197506	0.0105592	0.0394728	0.0012566	0	1.81165e-05	0.000860594	0.00472841	0.0315095	0.00905898	0.00772444	0.000196607	2.68708e-05	1.48336e-05	5.17962e-05	0.000514557	0.00200984	0.00335921	0.000556383	0.000180314
Lean	200	7	1	0.0033538	0.00592999	0.0062519	0.0463894	0.050755	0.0145221	0.826012	0.012012	0.0311313	0.0144082	0.0419721	0.0015331	0	0.000404476	0.0015811	0.0112185	0.048151	0.0101018	0.00884922	0.000249673	0	6.90083e-05	0.000195088	0.000967484	0.00359067	0.00529921	0.000610257	0.000482561
Lean	200	7	2	0.00356377	0.00563809	0.00487386	0.0424748	0.04384	0.0150011	0.793599	0.011918	0.0283323	0.0123734	0.0413901	0.0010323	9.83312e-05	0.000108176	0.00113799	0.00935629	0.0446202	0.00866667	0.00797396	0.000267357	4.74457e-06	0	0	0.000879999	0.00302727	0.00517016	0.000628774	0.00036889
Lean	200	8	1	0.00549033	0.00663652	0.00773099	0.0591233	0.0814967	0.0167841	1.30519	0.0140854	0.0394268	0.0204312	0.0621803	0.00157713	0	0.000198719	0.000833844	0.0105795	0.0516003	0.0136725	0.0131272	0.000302024	4.75858e-05	7.74483e-05	0.00017347	0.000925738	0.00273825	0.00591326	0.00111632	0.00072544
Lean	200	8	2	0.00340007	0.00430282	0.00455366	0.0389211	0.0534307	0.0153226	0.849247	0.00857111	0.0240038	0.0128833	0.0394522	0.000733572	0	0	0.000890351	0.00619706	0.0335824	0.00865557	0.00873523	0.000263616	2.85742e-05	6.44815e-06	4.64014e-05	0.000449221	0.00197946	0.0035829	0.000739641	0.00040282
Lean	200	LP	1	0.00349497	0.00379139	0.00479881	0.0365068	0.0421674	0.0142628	0.810383	0.00773343	0.0218962	0.00963388	0.0299572	0.00103668	8.58895e-05	0	0.000626481	0.00536916	0.0257282	0.00643671	0.00596913	0.000195158	0	7.00118e-05	0.000184531	0.000360061	0.00170341	0.00292299	0.000348809	0.000156776
Lean	200	LP	2	0.00373211	0.00460451	0.00452098	0.0374717	0.0451001	0.0154792	0.913811	0.00864028	0.0216988	0.0107757	0.0339625	0.000928722	0	6.2804e-05	0.000855429	0.00589322	0.0270264	0.00797171	0.00620801	9.33643e-05	3.26322e-05	5.05022e-05	4.48045e-05	0.000547366	0.00157683	0.00263078	0.000533899	0.000234511
obese	200	9	1	0.00798011	0.0150824	0.0140773	0.115938	0.0612274	0.0172804	0.843331	0.049916	0.0723706	0.0386038	0.0941297	0.00421774	0	0.000528267	0.00703605	0.0575118	0.165897	0.026956	0.0278953	0.000694431	7.12498e-06	4.10959e-05	0.000482081	0.00411786	0.0162041	0.0248654	0.00228916	0.00236957
obese	200	9	2	0.00962759	0.018778	0.0200467	0.155547	0.0856991	0.0221852	1.12188	0.0664974	0.106222	0.0535918	0.135874	0.00581247	0.000187359	0.000763731	0.00996336	0.0798474	0.228565	0.0367953	0.0396507	0.00118617	5.04479e-05	0.000227186	0.000682783	0.00542455	0.0236869	0.0363383	0.00391424	0.00302592
obese	200	10	1	0.00511733	0.0102774	0.00988726	0.076938	0.0508783	0.0161335	0.937874	0.0429389	0.0748648	0.0324153	0.0800869	0.00383146	4.57664e-05	0.000752192	0.00554755	0.0573902	0.163269	0.0252434	0.0289885	0.000894298	5.76838e-05	5.58811e-05	0.000246558	0.00340524	0.0143557	0.0274992	0.00318613	0.00154084
obese	200	10	2*
obese	200	11	1	0.00643447	0.0110665	0.0105823	0.0846336	0.0491044	0.0170167	1.06764	0.0290742	0.047497	0.0283753	0.0847005	0.00302116	0.000225395	0.000342862	0.00396366	0.0344734	0.119502	0.0196379	0.0223138	0.000666648	6.96098e-05	7.39604e-05	0.000329475	0.00258945	0.0111964	0.0171469	0.00136894	0.000798003
obese	200	11	2	0.00656903	0.00884019	0.00770651	0.0688133	0.0371763	0.0155392	0.207739	0.0214983	0.0400864	0.0232531	0.0646707	0.00208646	6.29709e-05	0.000218393	0.00307555	0.030291	0.0969916	0.0178667	0.0175272	0.000949376	2.88784e-05	2.46669e-05	7.78112e-05	0.00168658	0.010015	0.0138109	0.00142106	0.00136109
obese	200	12	1	0.00602235	0.0108027	0.0100217	0.0738723	0.0548255	0.0172652	1.0418	0.0262224	0.0592039	0.0285816	0.0724705	0.00284679	0.000213185	0.000284586	0.00425861	0.0392349	0.112908	0.0175023	0.021264	0.000472416	3.51068e-05	6.17338e-05	0.000338688	0.00289852	0.0123116	0.0189524	0.00153597	0.000887677
obese	200	12	2*
obese	200	13	1	0.0153239	0.0211019	0.023998	0.190926	0.109503	0.0205179	1.0331	0.0861068	0.143508	0.0697901	0.215847	0.00676189	0.000230249	0.000889957	0.0135369	0.124356	0.414981	0.0569617	0.0627488	0.00145849	3.04468e-05	0.000217176	0.00105771	0.00945276	0.0469611	0.0580081	0.00404926	0.00338972
obese	200	13	2*
obese	200	14	1	0.00824405	0.0114522	0.0132085	0.0978959	0.0644153	0.0173722	0.898143	0.0464334	0.0908332	0.0437756	0.151543	0.00449252	0.000127083	0.000859632	0.00873412	0.0858182	0.315787	0.0395462	0.0420219	0.00111643	1.2559e-05	0.000175211	0.000665626	0.00725989	0.0347586	0.0452808	0.00328167	0.0029994
obese	200	14	2	0.00499704	0.0150704	0.0126721	0.0933217	0.0820311	0.0173408	0.0799332	0.0265948	0.0795604	0.0482718	0.215027	0.0103433	0.000343616	0.000409001	0.00535875	0.0683657	0.305999	0.0521796	0.0620888	0.000950162	5.70375e-05	0	0.000261538	0.00548256	0.0303787	0.0442889	0.00498174	0.00772372
obese	200	15	1	0.00496833	0.0082891	0.00829965	0.0639327	0.0334978	0.0149126	0.646689	0.0260231	0.0425357	0.0235384	0.0823875	0.00298118	2.84096e-05	0.000368208	0.003593	0.037591	0.153983	0.0241247	0.0248482	0.000476875	0	9.27369e-05	0.000375311	0.00264889	0.0134898	0.0225577	0.00193002	0.00147425
obese	200	15	2	0.00654294	0.012184	0.0128562	0.0932792	0.0506266	0.0188152	1.01687	0.0386293	0.0626284	0.0337936	0.121204	0.00442531	6.96145e-05	0.000602756	0.00546321	0.057116	0.228742	0.0339612	0.0368827	0.00120484	2.09512e-05	0.000104533	0.000496291	0.00501261	0.0211017	0.0331219	0.00283614	0.00193241
obese	200	16	1	0.00680137	0.00963804	0.00936211	0.0706976	0.0394819	0.0155635	0.842651	0.0201601	0.0377843	0.0239359	0.10331	0.00283092	4.75463e-05	0.000299812	0.00321095	0.0325147	0.144336	0.0213132	0.0268136	0.000362681	4.34902e-05	3.58287e-05	0.000306121	0.0024163	0.0115528	0.0181816	0.00135034	0.000931885
obese	200	16	2	0.00627075	0.00874981	0.00771109	0.0595669	0.0376645	0.0146037	0.794737	0.0190111	0.0341455	0.0222993	0.0920465	0.00251773	0.000182849	0.000192328	0.00224695	0.0293208	0.122881	0.0197088	0.0249937	0.000532831	0	7.5709e-05	0.00028737	0.0022704	0.0105312	0.0162681	0.00133894	0.00088431
obese	200	OP	1	0.00928157	0.0133266	0.0141813	0.105957	0.0631703	0.0160611	0.839118	0.0448833	0.0768598	0.0393568	0.120202	0.00400372	5.45693e-05	0.000535863	0.00658322	0.060354	0.212381	0.031521	0.034348	0.000887728	1.20985e-05	5.57035e-05	0.000517967	0.00468414	0.0218123	0.031515	0.00228914	0.00176323
obese	200	OP	2	0.00874542	0.0124083	0.0113783	0.0908715	0.0541735	0.0164189	0.797747	0.0404441	0.0684782	0.0348599	0.109256	0.0035309	2.66295e-05	0.000421592	0.00522921	0.0535017	0.193623	0.0281322	0.031275	0.000718249	0	0.000118962	0.000476593	0.00420709	0.0190487	0.0292887	0.00198564	0.00183295
Lean	Background	LP	1	0.000676241	0.000515885	0.00063775	0.00420352	0.00473369	0.0132478	0.0460003	0.000815515	0.00223369	0.0012094	0.00311558	0.000164436	0	3.86268e-05	1.99934e-05	0.000378243	0.00188564	0.000497932	0.000483787	0	0	6.02524e-05	0	5.16837e-06	4.1347e-05	0.000168924	4.36592e-05	2.7746e-05
Lean	Background	LP	2	0.000585652	7.45424e-05	0.000159104	0.00126869	0.00148484	0.0129501	0.000445919	0.00010126	0.00024794	0.000703745	0.00100766	0	0	2.65841e-05	5.30347e-05	0.000161108	9.92563e-05	0	7.21379e-05	0	8.01532e-07	2.27101e-06	7.21379e-06	2.1107e-05	0	2.16414e-05	5.55729e-05	7.74814e-06
obese	Background	OP	1	0.00103722	0.000328716	0.000568639	0.00371632	0.00273293	0.0138622	0.0237117	0.00142932	0.00157823	0.0010735	0.00436446	0	3.31335e-05	7.81846e-05	0.000309464	0.00124794	0.00511697	0.000790882	0.00114252	0	1.34891e-05	1.42749e-05	0	0.000137642	0.000429688	0.000700125	4.05984e-05	1.45368e-05
obese	Background	OP	2	0.00130556	0.00022081	0.000219376	0.00160202	0.00148711	0.0124035	0.00062826	0.0011604	0.00086107	0.00065291	0.00109205	5.28224e-05	0	8.16464e-05	0	0.000305196	0.00112896	0.00013799	0.000100558	0	1.69553e-05	1.0434e-06	0	2.25636e-05	4.51272e-05	0.000102254	5.47787e-06	0
	Uncomplexed LNP			0.000688274	0.000190574	0.000606352	0.00084303	0.00119466	0.0109271	1.00463	0.000315954	4.39143e-05	0.00011714	4.69393e-05	5.01729e-05	5.40324e-05	0	0	5.95608e-05	0.000138523	1.4499e-05	0	0	3.07713e-05	2.1905e-06	2.71205e-06	3.2336e-06	2.60774e-05	0	7.71891e-06	3.12929e-06
* Not able to measure

## Sheet: LPC
Plasma type	Dose (ng)	Plasma#	repeat	16:0	16:01	18:0	18:1	18:2	18:3	20:0	20:1	20:2	20:3	20:4	20:5	22:1	22:2	22:3	22:4	22:5	22:6
Lean	200	1	1	0.0552533	0.000895898	0.0338772	0.00797063	0.00426547	3.61166e-05	0.000292648	0.000253642	0.000118669	0.000181615	0.00226234	8.15203e-05	9.96818e-05	7.49162e-05	6.35652e-05	0.000102158	5.44845e-05	0.000313905
Lean	200	1	2	0.0757891	0.000939161	0.0510606	0.0114159	0.00488526	1.57076e-05	0.000263151	0.00049159	0.000535998	0.000459593	0.00371223	5.77885e-05	3.74268e-05	3.80086e-05	0	7.58232e-05	0.000254619	0.000517382
Lean	200	2	1	0.0578217	0.000580053	0.0413099	0.00918907	0.00285005	0.000114087	0.000254338	0.000408057	0.000385355	0.000279926	0.0015293	0.000130632	0.000178345	2.03932e-05	2.27019e-05	2.55877e-05	2.03932e-05	0.000220478
Lean	200	2	2	0.0726962	0.00121077	0.0557442	0.0120204	0.00487739	3.44823e-05	0.000406372	0.000547082	0.000144974	0.000417496	0.00203946	0.000341486	0	2.92914e-05	0	2.26174e-05	0.000167592	0.000214124
Lean	200	3	1	0.0701984	0.000832752	0.0518646	0.00806966	0.00341483	0	0.000343035	0.00041269	0.000299573	0.000241948	0.00189368	0	0	5.27746e-05	9.37137e-05	2.71634e-05	0.000120101	0.000316454
Lean	200	3	2	0.0767684	0.000647821	0.0568667	0.0118033	0.0055847	7.51042e-05	0.000267016	0.000481762	0.000158323	0.000441756	0.0020114	0.000161719	0.00012813	2.09462e-05	1.47189e-05	0	0.000182288	0.000471005
Lean	200	4	1	0.0683225	0.000653633	0.0461227	0.00889831	0.00423966	7.35891e-05	0.000233097	0.000416299	0.000436719	0.00021807	0.00216741	0.000196302	3.92989e-05	2.38876e-05	4.25738e-05	8.99637e-05	5.6444e-05	0.000262378
Lean	200	4	2	0.0901267	0.00110595	0.0603278	0.0153728	0.00646803	3.47108e-05	0.000381635	0.000579745	0.000162661	0.000345262	0.00282432	0.000200695	5.42819e-05	8.43769e-05	2.45561e-05	5.35433e-05	0.00016543	0.000401021
Lean	200	5	1	0.0802913	0.000605165	0.0527827	0.0138315	0.00514294	0.000136076	0.000336075	0.000292439	0.0004844	0.000312917	0.00272707	5.24399e-05	0.000239425	3.44496e-05	2.08611e-05	0.000146602	0.00018909	0.000460093
Lean	200	5	2	0.0784208	0.000981035	0.0484939	0.0105378	0.00778149	8.04036e-05	0.000423361	0.000526579	0.000427961	0.00059392	0.00345	0	0.000118674	2.13428e-05	1.28793e-05	3.95578e-05	0.000155472	0.000425017
Lean	200	6	1	0.0717948	0.00108258	0.0457943	0.0131902	0.00744414	0	0.000221488	0.000554473	0.000406814	0.00033468	0.00343268	0.000161784	0	0	3.39012e-06	5.57486e-05	0.000123363	0.000498536
Lean	200	6	2	0.0694545	0.000604939	0.0556491	0.0141098	0.0055961	9.10299e-05	0.000278686	0.000430527	0.000219927	0.000315061	0.00346716	0.000181873	0	6.82724e-05	5.96917e-06	7.23762e-05	0.000147737	0.000516893
Lean	200	7	1	0.0736497	0.00113722	0.0581684	0.014073	0.0065931	7.36884e-05	0.000269458	0.00027404	0.000342413	0.000549547	0.00331506	0.000111632	5.1142e-05	3.84939e-06	2.29131e-05	5.26084e-05	0.000134912	0.000317117
Lean	200	7	2	0.0678432	0.00105222	0.0684145	0.0141237	0.0057996	0	0.000271244	0.00029302	0.000432736	0.000456254	0.0037354	0.000185881	0	6.86385e-05	8.18784e-06	0.000116546	0.000118985	0.000285703
Lean	200	8	1	0.113456	0.0010752	0.0720369	0.0195114	0.00901695	5.98526e-05	0.000470219	0.000632574	0.000293887	0.000572363	0.00490863	6.07486e-05	8.17149e-05	0	2.16831e-05	0	0	0.000484913
Lean	200	8	2	0.0732637	0.00084298	0.0501425	0.00987254	0.00560557	0.000127788	0.000198919	0.000395367	0.000242869	0.000438964	0.00322172	5.89521e-05	0.00010449	1.69443e-05	1.37673e-05	0	7.83675e-05	0.000190094
Lean	200	LP	1	0.0637762	0.00106849	0.04129	0.0113017	0.00557407	8.98048e-05	0.000360155	0.000561654	0.000375683	0.000338826	0.00240546	0.000121985	0	7.10954e-06	4.30314e-05	0	0.000125914	0.000317684
Lean	200	LP	2	0.0669559	0.000700058	0.0486495	0.0125705	0.0074233	1.96569e-05	0.000429338	0.000298162	0.000409876	0.000416687	0.00299797	0.000167959	0	4.2817e-06	1.4986e-05	7.12319e-05	0.000150833	0.00038438
obese	200	9	1	0.121812	0.00226384	0.202401	0.0246381	0.00702334	0.000128392	0.000300493	0.000291127	0.000862259	0.00394504	0.00978904	0.000149271	0	0.000326249	7.23915e-05	9.0343e-05	0.000679816	0.00149876
obese	200	9	2	0.185204	0.00426963	0.199717	0.0361901	0.015677	0.000384655	0.000338524	0.00031024	0.000524512	0.00588725	0.0186675	0.000557087	0.000163459	5.58842e-05	7.98764e-05	0.000326918	0.00099509	0.00282854
obese	200	10	1	0.0956535	0.00248931	0.201692	0.0200501	0.00831088	0.000255691	0.000350205	0.000494481	0.000463967	0.00268992	0.00938779	0.000237382	3.48954e-05	4.5849e-05	6.7287e-06	0.000131914	0.000553631	0.0011625
obese	200	10	2*
obese	200	11	1	0.107265	0.00146036	0.171788	0.0163874	0.00382086	9.63049e-05	0.000280477	0.00023335	0.000345685	0.00186125	0.00617123	0.000132103	3.54363e-05	8.31669e-06	1.67539e-05	0.000107514	0.000424633	0.000821304
obese	200	11	2*
obese	200	12	1	0.177819	0.00272531	0.260607	0.0260507	0.00760046	0.000196781	0.000340868	0.000337843	0.000379695	0.0044681	0.0179903	0.000231069	0	2.73552e-05	4.7651e-05	0.000194512	0.00179788	0.00260656
obese	200	12	2*
obese	200	13	1	0.130631	0.00195983	0.170207	0.0156362	0.00771088	0.000111289	0.000274521	0.000200632	0.000492294	0.00203021	0.00636398	0.000111159	0	2.64912e-05	3.14258e-05	0.000104796	0.000396458	0.00104692
obese	200	13	2*
obese	200	14	1	0.0999916	0.00118871	0.224302	0.0147335	0.00750535	0.000100979	0.000319072	0.00019467	0.000648294	0.00315832	0.0131998	0.000187774	0	2.62857e-05	2.94088e-05	0.000167474	0.000852203	0.00114577
obese	200	14	2*
obese	200	15	1	0.0995414	0.00140823	0.161659	0.0137444	0.00526545	6.68384e-05	0.000175874	0.000209293	0.000188965	0.00189504	0.00756998	0.000232702	2.41789e-05	4.91277e-05	4.31215e-06	0	0.000516226	0.00115042
obese	200	15	2	0.138213	0.00223308	0.227019	0.021124	0.00767067	0.000159545	0.00030285	0.0003553	0	0.00323512	0.0137312	0.000298571	0	5.77171e-05	0	0.00011313	0.00100807	0.00214618
obese	200	16	1	0.0917886	0.00171329	0.149574	0.0132447	0.00421659	2.25867e-05	0.00016523	0.00023299	0	0.00157568	0.00753596	0.000119188	0	2.83202e-05	5.21231e-06	0.000126485	0.000716693	0.00108468
obese	200	16	2	0.0845728	0.00141808	0.130253	0.0127242	0.00344985	8.27979e-05	0.000164037	0.000218976	0.000282292	0.00158543	0.00642297	0.000112021	6.85761e-05	1.32477e-05	4.44186e-05	0.000126632	0.000428016	0.000587573
obese	200	OP	1	0.114648	0.00147067	0.207189	0.0189071	0.0079551	3.76205e-05	0.000212411	0.000440256	0.000650159	0.00275382	0.00984519	0.000327395	0	0.000100128	2.6045e-05	9.14468e-05	0.000656912	0.00153453
obese	200	OP	2	0.0956011	0.00199708	0.182882	0.0172695	0.00711992	0.000136443	0.000144672	0.000321684	0.000432484	0.00285976	0.0106732	0.000198254	5.14771e-05	1.89451e-05	3.94211e-05	0.000176056	0.0011568	0.00128674
Lean	Background	LP	1	0.0138507	0.000146487	0.00559443	0.0019677	0.000773998	0.00012917	0	9.37192e-05	6.9067e-05	6.68259e-05	0.00028238	0.000125299	7.49754e-05	4.27849e-06	2.89307e-05	1.89476e-05	5.03231e-05	7.59941e-05
Lean	Background	LP	2	0.010278	0.000215543	0.00250979	0.000956771	0.000859286	0.000120942	0	0	0	0	0.000248614	0.000215735	0	5.03766e-05	2.69188e-06	2.88416e-06	2.98029e-05	2.44192e-05
obese	Background	OP	1	0.0135463	0.000309427	0.00676778	0.00109614	0.000883481	8.84078e-05	0	4.20136e-05	0.000127634	0	0.00071244	0.000131417	0	1.73232e-05	2.58852e-06	4.97792e-06	8.96025e-06	6.01332e-05
obese	Background	OP	2	0.0134808	7.39856e-05	0.00407681	0.000760052	0.000702064	3.43933e-05	0	2.51951e-05	0	0	0.000386725	0.000105779	0	2.91943e-05	0	6.39876e-06	9.09823e-05	0
	Uncomplexed LNP			0.00959801	0.000156845	0.0241915	0.00133251	0.000876247	2.46939e-05	2.77806e-05	7.13808e-06	4.08993e-05	6.46285e-05	0.000302693	0.000102634	0	4.45647e-05	4.6301e-06	8.2956e-06	3.53045e-05	5.82621e-05
* Not able to measure

## Sheet: PE
Plasma type	Dose (ng)	Plasma#	repeat	34:0	36:0	36:1	36:2	36:3	36:4	36:5	38:0	38:1	38:2	38:3	38:4	38:5	38:6	38:7	40:0	40:1	40:2	40:3	40:4	40:5	40:6	40:7	40:8
Lean	200	1	1	6.30563e-05	0.00195146	0.000109371	0.00026443	5.78929e-05	0	1.04833e-05	4.36544e-05	0	5.82058e-05	0.000106085	0.000547166	0.000136127	0.000130963	2.47218e-05	6.25869e-07	2.34701e-06	5.16342e-06	1.22044e-05	6.11787e-05	3.55181e-05	7.38526e-05	6.80633e-05	2.34701e-06
Lean	200	1	2	0.000136153	0.00315956	0.000187991	0.000553911	0.000100475	0	0	5.10763e-05	0	6.81525e-05	0.000252637	0.000638377	7.16592e-05	0.000188296	3.11032e-05	1.21973e-06	5.94619e-06	8.53812e-06	1.75336e-05	3.09507e-05	6.55606e-05	0.000106422	8.56861e-05	1.113e-05
Lean	200	2	1	0.000107149	0.00213863	7.25315e-05	0.000298967	4.8704e-05	0	2.47266e-05	4.94533e-05	0	5.73958e-05	0.000113293	0.000402819	6.80357e-05	9.2013e-05	6.14419e-06	2.24788e-06	1.49858e-06	6.44391e-06	1.49858e-07	5.51479e-05	9.14136e-06	5.02026e-05	2.89227e-05	3.74646e-06
Lean	200	2	2	9.40926e-05	0.00209138	0.000143216	0.000234301	0.000105263	0	1.94773e-05	5.35626e-05	0	4.94094e-05	0.000154386	0.000625566	0.000108844	5.62837e-05	2.7927e-05	1.1314e-05	2.00502e-06	1.8618e-06	2.86431e-07	1.11708e-05	2.74974e-05	3.73793e-05	0	6.4447e-06
Lean	200	3	1	9.66024e-05	0.00220187	0.000127333	0.000190173	7.46912e-05	0	3.07309e-05	2.46674e-05	0	2.14978e-05	0.000125542	0.000379519	6.54581e-05	4.36847e-05	8.68182e-06	2.61833e-06	2.20491e-06	0	1.79149e-06	1.80527e-05	4.23066e-05	3.92749e-05	4.64408e-05	6.06349e-06
Lean	200	3	2	0.00011624	0.00327362	0.000130406	0.000466767	4.66628e-05	0	5.13846e-05	3.33306e-05	0	6.63834e-05	0.000178596	0.000479405	5.70786e-05	7.3605e-05	2.27759e-05	1.38877e-07	4.16632e-07	5.13846e-06	6.66611e-06	5.2079e-05	3.13863e-05	5.47177e-05	8.31875e-05	0
Lean	200	4	1	9.81373e-05	0.0025644	7.34936e-05	0.000233896	6.64942e-05	0	3.6601e-05	5.29329e-05	0	1.61861e-05	0.00015282	0.000539536	4.05381e-05	0.000121031	3.6601e-05	4.37462e-07	6.56193e-06	4.37462e-07	1.45821e-06	3.67468e-05	1.10824e-05	4.31629e-05	1.89567e-05	5.97865e-06
Lean	200	4	2	0.000151476	0.00322025	0.000110755	0.000326747	4.58721e-05	0	2.67383e-05	6.23076e-05	0	9.44427e-05	0.000189253	0.000603697	0.000147919	7.39596e-05	6.7459e-06	3.18897e-06	3.18897e-06	8.95365e-06	9.93488e-06	1.58222e-05	4.63628e-05	8.92912e-05	8.67155e-05	4.90611e-06
Lean	200	5	1	7.35553e-05	0.0033743	0.000102923	0.000330387	5.65601e-05	0	2.4881e-05	3.33106e-05	0	6.21345e-05	0.00024106	0.000836981	0.000125765	0.000151054	5.13936e-05	2.17539e-06	1.90347e-06	7.61386e-06	4.07885e-06	5.54724e-05	5.45207e-05	8.83752e-05	5.52005e-05	1.75391e-05
Lean	200	5	2	0.000100693	0.00313721	0.000124832	0.000372564	0.000104003	0	5.20017e-05	2.91044e-05	0	4.20703e-05	0.00017642	0.000743197	0.000133797	8.71753e-05	1.98627e-05	8.27613e-07	1.51729e-06	9.65549e-06	8.1382e-06	3.06217e-05	6.59332e-05	6.28986e-05	9.61411e-05	8.00026e-06
Lean	200	6	1	0.000141149	0.00265413	0.000180257	0.00028709	6.3841e-05	0	1.79998e-05	4.62297e-05	0	4.86901e-05	0.000137135	0.000706524	0.000114732	0.000147236	2.11077e-05	1.68343e-06	2.4604e-06	5.69777e-06	2.07192e-06	3.14673e-05	6.02151e-05	0.000101006	3.83305e-05	1.2302e-05
Lean	200	6	2	9.86359e-05	0.00203195	0.000116606	0.000342364	6.98837e-05	0	3.96673e-05	6.37606e-05	0	3.95342e-05	0.000169185	0.000680734	0.000147621	0.000133112	1.5441e-05	2.66224e-07	1.33112e-07	2.12979e-06	4.5258e-06	4.95176e-05	5.96341e-05	9.35776e-05	5.99003e-05	7.98671e-07
Lean	200	7	1	0.000137238	0.00273236	0.000184773	0.000480077	0.000114876	0	3.88457e-05	4.15291e-05	0	7.0919e-05	0.000232308	0.00150898	0.000164711	0.000186689	3.34789e-05	3.45011e-06	5.6224e-06	1.41838e-05	7.41135e-06	5.04739e-05	0.000103631	0.000205218	0.000121521	4.98349e-06
Lean	200	7	2	0.000159224	0.00245017	0.000175854	0.00045432	6.43973e-05	0	2.97219e-05	5.00082e-05	0	8.26786e-05	0.000216899	0.00136402	0.000110985	0.000117944	2.54759e-05	3.18448e-06	9.43551e-07	2.35888e-07	4.59981e-06	4.91826e-05	9.69499e-05	0.000225391	0.000129856	1.72198e-05
Lean	200	8	1	9.3826e-05	0.00451212	0.000300916	0.000691671	0.000109526	0	6.82824e-05	4.46079e-05	0	6.56658e-05	0.000243848	0.00186581	0.000316741	0.000267149	4.72245e-05	3.48888e-06	1.74444e-06	1.23357e-05	1.20865e-05	4.22404e-05	0.000137562	0.000225781	0.000202978	2.59174e-05
Lean	200	8	2	0.000101954	0.00190297	0.000192148	0.000387174	9.41976e-05	0	4.97884e-05	7.31814e-05	0	8.34393e-05	0.0001949	0.0010079	0.000185018	0.000195776	4.70363e-05	3.75289e-06	6.25482e-07	1.18842e-05	3.12741e-06	4.34085e-05	5.79197e-05	0.000165878	8.98193e-05	1.50116e-05
Lean	200	LP	1	0.000119262	0.00234846	0.000102934	0.000224752	4.86986e-05	0	2.35684e-05	4.20256e-05	0	8.23474e-06	8.85945e-05	0.000434312	7.28349e-05	5.67913e-05	3.49267e-05	1.2778e-06	1.10743e-05	1.56176e-06	7.09892e-07	3.13772e-05	1.51917e-05	3.71983e-05	3.2513e-05	0
Lean	200	LP	2	9.01523e-05	0.0021564	8.18625e-05	0.000196625	2.8626e-05	0	2.21495e-05	4.88325e-05	0	4.71486e-05	3.85997e-05	0.000437032	0.000112043	5.49204e-05	2.202e-05	3.36776e-06	1.03623e-06	2.59058e-07	1.80046e-05	1.85227e-05	1.5673e-05	7.16297e-05	4.61124e-05	8.4194e-06
obese	200	9	1	0.000104644	0.00173358	0.000256248	0.000550468	0.000177982	0	3.01468e-05	3.43499e-05	0	0.000119717	0.000684535	0.00259871	0.000467565	0.000617864	6.33372e-05	8.26137e-06	6.66707e-06	1.66677e-05	2.37696e-05	0.000195374	0.000702797	0.000988466	0.000183924	4.11619e-05
obese	200	9	2	0.000103624	0.004265	0.000609529	0.00135437	0.000307168	0	5.94211e-05	0.000171205	0	0.0002508	0.00112074	0.00588274	0.00101877	0.00134311	8.54522e-05	6.00719e-06	4.00479e-06	2.47796e-05	7.2737e-05	0.000339006	0.00130802	0.00185647	0.000394572	5.71684e-05
obese	200	10	1	0.000137233	0.00311844	0.000343974	0.000963899	0.000213177	0	3.78232e-05	3.40607e-05	0	0.000189908	0.000733395	0.00376539	0.000608637	0.000870331	9.11916e-05	1.09905e-05	2.27732e-06	1.94067e-05	4.19818e-05	0.000156244	0.000573091	0.00151511	0.000379916	4.03976e-05
obese	200	10	2*
obese	200	11	1	0.000116565	0.00334623	0.000303853	0.000397319	0.000118133	0	4.89787e-05	3.5219e-05	0	0.000109507	0.000552668	0.00161459	0.000278544	0.000323673	5.41118e-05	4.91926e-06	5.27572e-06	7.12936e-06	3.57181e-05	9.4963e-05	0.000336292	0.000627811	0.000191922	3.63597e-05
obese	200	11	2*
obese	200	12	1	0.000171068	0.00351997	0.000533322	0.00202944	0.000300485	0	6.36813e-05	0.000106608	0	0.00022207	0.00127873	0.00885843	0.00175722	0.00213917	0.000203299	6.37522e-06	1.38838e-05	2.49342e-05	0.000124246	0.000535872	0.00253719	0.00352776	0.000935315	0.00012375
obese	200	12	2*
obese	200	13	1	0.000150381	0.003439	0.000284172	0.000532221	0.000141906	0	4.94087e-05	0.000105137	0	0.000119285	0.000451213	0.00197707	0.000343419	0.000518145	4.99114e-05	3.3753e-06	1.50811e-06	1.59429e-05	1.67329e-05	0.000109087	0.00030428	0.000796141	0.000185713	3.23885e-05
obese	200	13	2*
obese	200	14	1	0.000126932	0.00273483	0.000437863	0.000741359	0.000206394	0	3.96014e-05	9.32967e-05	0	0.000130736	0.00101554	0.00583109	0.00115899	0.000967467	0.000110417	8.73306e-06	7.78193e-06	2.44699e-05	4.91991e-05	0.000376732	0.0011385	0.00184821	0.000720607	9.18268e-05
obese	200	14	2*
obese	200	15	1	8.47658e-05	0.00199367	0.000221623	0.000312443	5.3344e-05	0	2.53671e-05	7.31783e-05	0	0.000123182	0.000384578	0.00258462	0.00049137	0.000673533	6.25304e-05	0	6.26348e-07	2.20266e-05	2.5889e-05	0.000134978	0.000481244	0.00114329	0.000341046	3.97731e-05
obese	200	15	2	0.000229591	0.00350083	0.000374874	0.000484946	0.0001392	0	3.04165e-05	8.03711e-05	0	9.81916e-05	0.000930601	0.00481761	0.000879	0.000916717	7.48603e-05	5.86859e-06	1.2095e-05	3.18478e-05	3.34223e-05	0.00030896	0.00117193	0.00171141	0.000324562	3.35655e-05
obese	200	16	1	0.000162948	0.00173465	0.000268475	0.000862611	8.93738e-05	0	4.43332e-05	3.97348e-05	0	8.06487e-05	0.000483774	0.00250883	0.00045807	0.000573737	6.28446e-05	1.45026e-05	7.07444e-07	1.59175e-05	3.38394e-05	0.000148092	0.000522801	0.00107744	0.000242653	3.15992e-05
obese	200	16	2	0.000127671	0.00253589	0.000196589	0.000429516	0.000116951	0	2.97946e-05	5.59694e-05	0	7.88027e-05	0.000615385	0.0033299	0.000519179	0.000590463	6.01462e-05	2.08841e-06	2.36686e-06	4.5945e-06	1.36443e-05	6.87783e-05	0.000572503	0.000941873	0.000235294	3.18831e-05
obese	200	OP	1	0.000133654	0.00252783	0.000288419	0.000635557	0.0001008	0	2.34874e-05	0.000113802	0	0.000113662	0.000731884	0.00390576	0.000607876	0.000788086	8.62602e-05	1.39806e-07	1.30019e-05	1.25825e-05	4.27806e-05	0.000186082	0.000960047	0.00134214	0.000293313	2.15301e-05
obese	200	OP	2	0.000107096	0.00257918	0.000249522	0.000867717	0.000110006	0	2.96489e-05	3.90701e-05	0	9.61513e-05	0.000535205	0.00330558	0.000534651	0.000586052	6.59481e-05	5.9575e-06	5.9575e-06	1.75954e-05	5.9575e-05	0.000165563	0.000737206	0.00128308	0.000234005	2.18903e-05
Lean	Background	LP	1	0.000139637	0.000205385	6.74701e-05	0.000103475	5.072e-05	0	1.28365e-05	5.22854e-05	0	6.01126e-05	6.73136e-06	0.000202254	2.86474e-05	4.05447e-05	6.26173e-07	0	0	1.0958e-06	2.03506e-06	1.95679e-05	5.47901e-06	1.72198e-06	6.73136e-06	9.39259e-07
Lean	Background	LP	2	7.32341e-05	5.4961e-05	0	9.57568e-05	2.62056e-05	0	2.49308e-05	4.77367e-05	0	1.37402e-05	0	0.00012692	8.64077e-06	8.64077e-06	8.49912e-07	8.21582e-06	5.09947e-06	8.49912e-07	9.91564e-07	1.60067e-05	7.0826e-07	1.27487e-06	4.24956e-06	0
obese	Background	OP	1	0.000104308	0.000121668	8.29417e-05	6.29111e-05	1.11281e-05	0	2.6114e-05	4.51061e-05	0	6.52851e-06	2.18112e-05	0.000211286	1.57278e-05	2.70043e-05	7.12201e-06	4.30288e-06	0	1.92888e-06	2.9675e-07	4.74801e-06	5.78663e-06	4.30288e-05	3.26425e-06	0
obese	Background	OP	2	0.000127756	5.27718e-05	1.34166e-05	4.82996e-05	5.50079e-05	0	7.60272e-06	4.18895e-05	0	6.63375e-05	1.10314e-05	0.000108227	5.06848e-06	4.32312e-06	5.81385e-06	3.8759e-06	1.78888e-06	1.11805e-05	5.96292e-07	1.40129e-05	1.52054e-05	1.34166e-06	4.47219e-06	0
	Uncomplexed LNP			7.25034e-05	0.00244562	0	7.38033e-05	3.48074e-05	0	8.37689e-06	5.87827e-05	0	4.14512e-05	9.07015e-05	8.82462e-05	1.38652e-05	1.76204e-05	6.64374e-06	6.35488e-06	5.77717e-07	9.67675e-06	8.95461e-06	1.22765e-05	5.48831e-06	7.22146e-07	3.17744e-06	1.05433e-05
* Not able to measure

## Sheet: SM
Plasma type	Dose (ng)	Plasma#	repeat	d18:1 24:0	d18:1 24:1	d18:1 22:0	d18:1 22:1	d18:1 20:0	d18:1 20:1	d18:1 18:0	d18:1 18:1	d18:1 18:2	d18:1 18:3
Lean	200	1	1	0.00589628	0.00779044	0.00255389	0.00116827	0.000619265	0.00026329	0.00151686	0.00018783	0.000160216	0.000926027
Lean	200	1	2	0.00783342	0.0088246	0.00305771	0.00144416	0.000261268	0.000236373	0.00156299	0.000348785	8.72604e-05	0.000640338
Lean	200	2	1	0.00489807	0.00671937	0.00187466	0.00126569	0.000157796	0.00015703	0.00125675	0.000409811	0.000149115	0.000857156
Lean	200	2	2	0.0074784	0.0099013	0.0031191	0.00145394	0.000422938	2.178e-05	0.00185662	0.000441679	0.000191715	0.000765846
Lean	200	3	1	0.00559652	0.00602192	0.00185077	0.000835484	0.000405563	0.000187086	0.000842265	0.00021697	0	0.000762659
Lean	200	3	2	0.0055158	0.0067293	0.00178888	0.000759608	0.000555383	0	0.00103718	0.000222746	5.35875e-05	0.00066083
Lean	200	4	1	0.00429191	0.00596761	0.00206615	0.0006942	7.31771e-05	0.000225425	0.000630354	0.000464109	0.000149055	0.000817226
Lean	200	4	2	0.00545065	0.00831839	0.00263527	0.00142844	0.000721384	0.00025199	0.00100154	0.000336975	6.29975e-05	0.0007451
Lean	200	5	1	0.00533432	0.00652554	0.00175143	0.00102552	0.000367575	0.000214953	0.000691287	0.000323456	8.33648e-05	0.000864173
Lean	200	5	2	0.00647889	0.00768856	0.002088	0.00116421	0.000387017	0.000120821	0.000617963	0.000216846	7.85217e-05	0.000561807
Lean	200	6	1	0.00459904	0.00792382	0.00183851	0.000916989	0.000445653	0.000158622	0.000887278	0.000290052	0.000330086	0.000655388
Lean	200	6	2	0.00626138	0.00692439	0.00214314	0.000903892	0.0006421	9.73607e-05	0.00096904	0.000352662	5.98588e-05	0.000379827
Lean	200	7	1	0.00586621	0.00702413	0.00269127	0.00108393	0.000796129	0.000135521	0.00135881	0.000288043	0.000167845	0.000567706
Lean	200	7	2	0.00595038	0.00687387	0.00248162	0.0011268	0.000522249	0.000166933	0.00153178	0.000288636	5.61884e-05	0.000728817
Lean	200	8	1	0.00851524	0.0108459	0.00325234	0.00175089	0.000977019	0.000233111	0.00160181	0.000469144	9.42673e-05	0.000541002
Lean	200	8	2	0.00626184	0.00775471	0.00254297	0.00069634	0.00011038	0.000250344	0.000955883	0.000208082	8.25366e-05	0.000772413
Lean	200	LP	1	0.00641068	0.00806751	0.00206769	0.00105027	0.000390901	0.000148961	0.00120118	0.000273582	5.52519e-05	0.000733852
Lean	200	LP	2	0.00613902	0.00851798	0.00313903	0.00120487	0.00019085	0.000219067	0.000955534	0.00017905	4.54039e-05	0.000516373
obese	200	9	1	0.00739502	0.0149639	0.00783498	0.00195259	0.000765357	0.000180158	0.00395845	0.000840485	8.61843e-05	0.000853551
obese	200	9	2	0.00849515	0.0189902	0.00645865	0.00180632	0.00113058	0.000339416	0.00521149	0.000976595	7.52727e-05	0.000816985
obese	200	10	1	0.00816926	0.0132104	0.00522997	0.00119616	0.00105191	0.000330511	0.00376329	0.000822234	0.000113262	0.000645632
obese	200	10	2*
obese	200	11	1	0.00630638	0.0135913	0.00448991	0.00150258	0.00120115	0.000333766	0.00455332	0.000783152	0.000192121	0.000708228
obese	200	11	2	0.00243894	0.0101403	0.0194759	0.00315528	0.00125436	0.00038375	0.00479338	0.000992323	0.000148848	0.00027599
obese	200	12	1	0.00733515	0.0116692	0.00479545	0.00185538	0.000960031	0.000232195	0.00379039	0.000897362	0.00012601	0.000722291
obese	200	12	2*
obese	200	13	1	0.0116227	0.0209367	0.00814588	0.00183019	0.00151159	0.000516034	0.00889652	0.00153239	4.66592e-05	0.000777653
obese	200	13	2*
obese	200	14	1	0.00788688	0.0136577	0.00527211	0.00154906	0.000937479	0.000306974	0.00405503	0.000899128	5.55831e-05	0.000572725
obese	200	14	2	0.00433357	0.00733133	0.0043648	0.00348698	0	0.00056555	0.00430928	0.00114845	0.000138785	0.00103048
obese	200	15	1	0.00552419	0.0103266	0.0041418	0.00110922	0.000654414	0.000210975	0.00337849	0.000583125	6.8603e-05	0.000809804
obese	200	15	2	0.00783485	0.0129901	0.00503497	0.00140249	0.000936742	0.000274667	0.00413303	0.00073988	9.82296e-05	0.000659657
obese	200	16	1	0.00569382	0.0103775	0.00354686	0.00132422	0.000801784	0.000199827	0.00389222	0.000858781	7.65964e-05	0.000461831
obese	200	16	2	0.00595132	0.00979512	0.0038488	0.00114095	0.000727989	0.000118916	0.00357024	0.000810431	0	0.000497151
obese	200	OP	1	0.0087041	0.0158541	0.00620449	0.00168262	0.00152383	0.000412591	0.0053416	0.0011038	0.00011363	0.00076266
obese	200	OP	2	0.00753759	0.0144814	0.00506499	0.00180597	0.000759388	0.000497496	0.0052438	0.0010379	0.000157483	0.00062745
Lean	Background	LP	1	0.000458446	0.000768366	0.000683915	0.000154692	0.000159518	0	0.000262199	0.00012681	6.78285e-05	0.000886061
Lean	Background	LP	2	0.000233852	0.000191009	0.000395789	3.67227e-05	7.14052e-05	7.82907e-05	0.000264964	2.04015e-05	0.000113993	0.000719917
obese	Background	OP	1	0.00062164	0.000607088	0.000789112	0.000159814	0.000159558	3.03799e-05	0.000399279	0	1.32753e-05	0.000620874
obese	Background	OP	2	0	0.000254237	0.000431552	8.50066e-05	0.000266493	7.61408e-05	0.000215385	2.92047e-05	4.14603e-05	0.000600783
	Uncomplexed LNP			0.000162553	0.000104355	0.000118654	8.83007e-05	0.000294252	1.58038e-05	0.000139475	4.61572e-05	0.000139977	0.000590511
* Not able to measure
