# Supplementary material for: Multiomics analysis of naturally efficacious lipid nanoparticle coronas reveals high-density lipoprotein is necessary for their function
Source: Nat Commun. 2023 Jul 6;14:4007. doi: 10.1038/s41467-023-39768-9 (PMC10325984; doi:10.1038/s41467-023-39768-9)
Supplement: Supplementary file 5 — Supplementary_Data_3 [file 41467_2023_39768_MOESM5_ESM.xlsx]

## Sheet: by hit
Coronal component	Corona	1	2	3	4	5	6	7	8	9	10	11	12	13	14	15	16		LP	OP
	Plasma	Lean	Lean	Lean	Lean	Lean	Lean	Lean	Lean	Obese	Obese	Obese	Obese	Obese	Obese	Obese	Obese		Lean	Obese
LPC 16:0	Lipid	-0.242649	-0.382249	-0.197055	0.0062647	-0.0782888	-0.517492	-0.524798	-0.0255362	1.5386	0.446896	0.393348	3.84531	-0.218513	2.01695	0.591667	0.893049		-0.537685	1.11696
LPC 16:1	Lipid	-0.615919	-0.430714	-0.825925	-0.807016	-0.448498	-0.99066	-0.688897	-0.402653	2.27646	0.749614	-0.118551	3.13522	-0.118001	1.31634	0.694321	0.914708		-0.833467	1.24726
LPC 18:0	Lipid	-0.712655	-0.654545	-0.564648	-0.548877	-0.543942	-0.792434	-0.666248	-0.584027	1.39357	1.17951	0.977821	3.01941	0.304904	1.94028	1.08069	1.16623		-0.738097	1.56349
LPC 18:1	Lipid	-0.421135	-0.549687	-0.511846	-0.405987	-0.213925	-0.618468	-0.337251	-0.17102	2.30935	0.813204	-0.0864704	3.61604	-0.310713	1.29867	0.550202	0.807578		-0.670462	1.69016
LPC 18:2	Lipid	-0.149207	-0.462664	-0.517392	-0.139166	0.0274839	-0.394868	-0.389868	-0.0583263	2.22018	0.814812	-0.180596	3.82507	-0.335449	1.66718	-0.327297	0.611841		-0.31312	1.56817
LPC 20:0	Lipid	1.51947	0.326941	1.82068	2.48903	1.69345	0.43129	-0.361466	1.24785	0.621473	0.908571	0.225856	1.93211	-0.929185	0.754611	0.00487883	-0.404909		0.496943	0.238528
LPC 20:1	Lipid	0.220566	0.564552	2.14538	1.30184	1.11788	0.557096	0.0574463	0.778245	1.26652	0.905631	-0.467223	1.79361	-1.09697	1.01163	-0.255963	-0.214815		0.756569	0.794922
LPC 20:3	Lipid	-0.761152	-0.799305	-0.79887	-0.702537	-0.705864	-0.794473	-0.683198	-0.64826	1.90367	0.876689	0.205529	3.26754	0.0970511	1.848	0.356839	0.741104		-0.73943	1.58122
LPC 20:4	Lipid	-0.670583	-0.830856	-0.754041	-0.683082	-0.635328	-0.689916	-0.708255	-0.53737	1.25566	0.323165	0.0649381	3.78651	-0.157346	1.64109	0.67725	0.993563		-0.71193	1.57524
LPC 22:6	Lipid	-0.548461	-0.765509	-0.768604	-0.734933	-0.654761	-0.701235	-0.618441	-0.632509	1.68546	0.634392	0.0128483	3.22951	0.0813741	2.29681	0.19098	0.673186		-0.621538	2.04307
PC 32:0	Lipid	-0.578569	-0.542307	-0.605352	-0.505827	-0.608216	-0.595789	-0.469189	-0.4618	0.941481	-0.0514782	0.511205	-0.0398986	4.15225	1.93368	0.52916	1.32574		-0.510617	1.91908
PC 32:1	Lipid	-0.565666	-0.581396	-0.75057	-0.660081	-0.665341	-0.735844	-0.431658	-0.573787	1.46583	0.508934	0.442781	0.161943	4.03207	1.71823	0.598853	1.08128		-0.658888	1.64816
PC 34:0	Lipid	-0.549747	-0.502722	-0.571319	-0.624484	-0.635296	-0.637641	-0.473583	-0.560493	1.33759	0.386534	0.455882	-0.0965958	4.15497	1.87216	0.623568	1.08645		-0.611422	1.59967
PC 34:1	Lipid	-0.551379	-0.529339	-0.566838	-0.567136	-0.637497	-0.65694	-0.441211	-0.501152	1.37251	0.441675	0.401636	-0.0576319	4.2632	1.74693	0.513453	1.00531		-0.576826	1.5852
PC 34:2	Lipid	-0.397937	-0.426902	-0.37402	-0.301199	-0.440803	-0.373415	-0.339859	-0.115962	1.07902	0.29261	0.0808171	-0.083469	4.45833	2.0718	0.152399	0.849274		-0.441793	1.56887
PC 34:3	Lipid	-0.430761	-0.845258	-0.976277	-0.557156	-0.524678	-0.51744	-0.534023	-0.439375	1.7774	0.655345	-0.140344	-0.257502	3.52621	1.81933	0.461031	0.60842		-0.742828	1.46017
PC 36:1	Lipid	-0.602175	-0.58429	-0.607518	-0.625502	-0.640036	-0.665783	-0.502572	-0.576758	1.40341	0.771503	0.197663	-0.0740151	4.20218	1.89078	0.511153	0.792897		-0.613601	1.46147
PC 36:2	Lipid	-0.593956	-0.556665	-0.609891	-0.591458	-0.643345	-0.657751	-0.453304	-0.516618	1.17532	0.733173	0.0983064	0.0275155	4.09096	2.34774	0.410033	0.773883		-0.597338	1.45742
PC 36:3	Lipid	-0.611992	-0.621924	-0.623584	-0.620193	-0.638297	-0.651477	-0.529776	-0.536727	1.05995	0.611008	0.199846	0.00335891	4.06454	2.27893	0.5309	0.94837		-0.629163	1.51164
PC 36:4	Lipid	-0.611698	-0.68083	-0.587143	-0.60325	-0.605061	-0.590065	-0.518886	-0.520521	0.745463	0.218741	0.133931	-0.147535	4.06107	2.42184	0.684579	1.11105		-0.613126	1.45242
PC 36:5	Lipid	-0.536564	-0.733159	-0.745703	-0.612711	-0.702526	-0.716239	-0.624764	-0.61544	1.31266	0.577939	0.155891	-0.138661	3.59638	2.10319	0.736698	1.04886		-0.666019	1.53901
PC 38:2	Lipid	-0.581563	-0.62765	-0.638368	-0.634756	-0.595375	-0.673199	-0.453487	-0.609097	1.01563	0.725941	0.068112	0.0159875	4.10666	2.40238	0.539853	0.67414		-0.638222	1.31426
PC 38:3	Lipid	-0.62928	-0.634006	-0.635227	-0.643105	-0.647822	-0.659193	-0.556782	-0.618774	0.945415	0.662403	0.0799102	-0.0143096	4.00717	2.5256	0.586201	0.7492		-0.639005	1.38719
PC 38:4	Lipid	-0.617447	-0.638959	-0.610492	-0.622684	-0.631022	-0.626608	-0.524035	-0.579899	0.673448	0.428953	0.00577609	-0.169665	3.94913	2.74278	0.753023	0.863904		-0.621748	1.35836
PC 38:5	Lipid	-0.608603	-0.703025	-0.603996	-0.64743	-0.640495	-0.620435	-0.565824	-0.55944	0.814061	0.568054	0.0702115	-0.204451	3.95415	2.50565	0.806797	0.900866		-0.635316	1.40807
PC 38:6	Lipid	-0.662934	-0.692617	-0.637209	-0.661779	-0.66201	-0.64557	-0.597657	-0.579962	0.891932	0.591251	0.0739458	-0.117267	3.9354	2.31105	0.844554	1.03135		-0.681234	1.43623
PC 40:4	Lipid	-0.621133	-0.616476	-0.570413	-0.619484	-0.609513	-0.595975	-0.499913	-0.587748	0.650483	0.306269	-0.00251305	-0.0534113	3.90646	2.97771	0.642212	0.710322		-0.602293	1.3168
PC 40:5	Lipid	-0.592999	-0.594824	-0.56946	-0.593122	-0.590563	-0.597104	-0.518132	-0.574342	0.578281	0.235657	-0.0161683	-0.111068	4.10545	2.81779	0.611893	0.640481		-0.590732	1.22168
PC 40:6	Lipid	-0.64201	-0.644149	-0.639586	-0.650551	-0.645212	-0.646116	-0.57323	-0.607307	0.82202	0.617339	-0.0290855	-0.0360287	3.82308	2.77734	0.759724	0.773118		-0.653308	1.41074
PC 40:7	Lipid	-0.639143	-0.791501	-0.78791	-0.771485	-0.752428	-0.745496	-0.605355	-0.623656	1.46141	1.48538	-0.0346086	-0.206129	3.06947	2.42891	1.08421	0.665084		-0.668932	1.46354
PC 40:8	Lipid	-0.591278	-0.719797	-0.677798	-0.665759	-0.65842	-0.650171	-0.623039	-0.506125	1.1177	0.525526	-0.230881	-0.279086	3.21955	2.9223	0.64688	0.568428		-0.671602	0.975128
Apolipoprotein C-II	Protein	-1.26972	-1.72859	-1.7649	-0.801705	-0.789981	-1.2061	-0.460498	-0.383897	1.56098	1.3693	0.93932	-0.211161	0.646177	1.57718	1.64197	0.59179		-0.927324	0.840572
Actin, cytoplasmic 2	Protein	1.22209	2.69865	-0.164375	1.17322	-0.254255	0.222657	1.6558	0.58198	-1.21988	-0.94854	-0.547126	0.297767	-0.906748	-1.26744	0.349322	-0.532788		0.628002	-0.99154
Alpha-1-inhibitor 3	Protein	0.400393	0.372157	-0.105557	0.341448	-0.207346	-0.477979	-0.493581	0.357657	2.07258	-0.0630053	0.927796	-0.238752	-1.7072	1.11859	-0.340181	-0.747798		-0.381906	0.516441
Alpha-1-macroglobulin	Protein	0.492223	-0.191732	0.105157	-0.298201	-0.874379	-0.672107	-1.32528	-0.965054	2.8614	0.212108	0.311117	-0.0901302	-1.79253	1.24918	0.453367	-0.0761184		-0.930844	-0.0145468
Alpha-2-HS-glycoprotein	Protein	1.45751	1.25042	0.826276	1.29849	0.267403	1.0629	0.430067	1.78074	-1.60355	-0.0150819	-0.946984	-1.3592	-0.528694	-0.234666	-2.18835	-1.07726		0.358055	-0.508203
Alpha-actinin-4	Protein	0.239481	0.617589	0.27173	0.670115	0.528896	-0.394162	-0.373002	-0.0201439	-1.02187	0.531593	0.230502	0.741394	1.46815	-1.37763	0.532914	0.275903		-0.0585516	-1.05328
Alpha-enolase	Protein	-0.37885	0.198439	-0.101008	0.179909	-0.0451471	-0.334332	-0.281711	0.463393	-0.802523	1.05824	1.51745	1.03264	1.19885	-0.152866	0.967106	0.372788		0.587572	-0.914464
Apolipoprotein A-I	Protein	-0.334677	0.587371	1.31583	0.608163	-1.69037	0.292255	0.247397	-0.386149	0.103702	0.171111	0.708769	0.839256	-0.24218	1.54309	0.292428	1.60628		0.766042	1.23786
Apolipoprotein A-II	Protein	-1.06506	-1.72583	-1.52792	-1.07424	-1.29176	-1.63383	-0.503918	-0.291421	1.52137	1.85651	1.71194	0.439431	0.802246	1.03919	1.05669	0.812882		-1.51909	0.516043
Apolipoprotein A-IV	Protein	-0.083361	0.221648	0.838034	0.253054	-0.227915	0.687263	1.10684	0.509942	-0.710743	-0.572463	-0.164488	1.42768	1.42596	-1.9186	-1.64314	0.428096		1.1777	0.49523
Apolipoprotein B-100	Protein	-0.702456	-0.961023	-0.763615	-0.694091	-0.559871	-0.967122	0.12402	-0.872759	0.938496	0.993734	1.48249	-0.554579	-0.00932285	0.761665	0.915372	0.532245		-0.496059	1.12993
Apolipoprotein C-I	Protein	-1.27523	-1.66618	-0.517505	0.133325	-0.108973	-0.69494	0.407146	-1.48538	1.10764	0.0114203	0.339406	-1.80998	-1.19486	0.6235	0.716096	0.600631		-1.20081	0.667901
Apolipoprotein C-III	Protein	-1.33678	-1.41171	-1.36599	-0.947942	-0.619513	-0.771447	-0.315451	-1.02379	1.7018	0.595423	0.939609	-0.141124	0.124787	1.12341	0.997267	0.727782		-1.18379	0.837212
Apolipoprotein C-IV	Protein	-1.21411	-1.04306	-1.36473	-1.13425	-0.691457	-1.66029	-0.665774	-1.30012	1.20303	0.493437	1.11563	-0.334387	0.47735	1.21026	1.40995	0.523361		-0.877532	1.14515
Apolipoprotein E	Protein	0.18742	-0.223892	0.510862	1.09093	1.23146	1.4728	0.775874	-0.497634	0.0412742	-1.4268	-2.12956	-0.963988	-0.0406174	-1.35362	0.365649	0.049018		0.423569	-0.260579
Apolipoprotein M	Protein	-1.07836	-0.740731	-1.08036	-1.114	-1.10054	-1.36546	-0.656165	-0.807558	1.1378	0.67326	1.80733	0.213357	-0.391655	1.44775	1.33475	0.780861		-0.461526	1.13343
Apolipoprotein N	Protein	0.110854	-0.150193	-1.70596	-0.0422496	-1.45787	-1.16622	-0.67049	1.10473	0.485424	-0.500785	1.58942	0.0963373	0.398373	0.618875	1.91139	1.82454		0.148735	-0.567957
Ceruloplasmin	Protein	1.52271	1.72914	0.0797938	0.14696	-0.785463	-0.0396051	-0.589045	0.794447	0.256336	0.08096	0.635507	0.222043	0.490246	1.0907	-0.81224	-0.882522		0.743927	1.22512
Clusterin	Protein	0.6451	0.578683	0.687873	0.128333	-0.18953	0.567457	-0.151246	-1.50263	-0.406568	-1.89837	-3.38541	-2.0459	-0.242435	-1.44732	-0.185452	-0.0574991		-0.390224	-0.206621
Complement C1q subcomponent subunit A	Protein	-0.724337	-0.577655	0.12822	-0.189317	0.237209	-0.275661	-0.709431	-0.519233	-1.11747	-0.323948	-2.76361	0.141714	-0.333388	-1.3898	-0.608245	-0.830075		0.0705306	-1.72879
Complement C1q subcomponent subunit B	Protein	-0.567885	-0.320559	0.212171	-0.00376232	0.442923	0.427022	-0.360994	-0.698534	-1.51806	-0.69997	-2.63481	-0.570515	-0.617124	-1.53636	-0.831177	-0.944256		-0.369656	-1.94996
Complement C1q subcomponent subunit C	Protein	-0.76566	-0.733638	0.101578	-0.400234	-0.199657	0.0552158	-0.599382	0.0571312	-1.28139	-0.000906205	-2.0227	-0.0610919	-0.39285	-1.4171	-0.764785	-1.04537		-0.491982	-2.35636
Complement C1s subcomponent	Protein	-0.605395	-0.196938	0.358745	-0.0399046	-0.116526	0.0448196	-0.486388	-1.15805	-0.9383	-0.831447	-2.70793	-0.434484	-0.963588	-1.38464	-1.0498	-0.953904		-0.551042	-1.65887
Complement C3	Protein	1.43967	2.60245	0.0937215	-0.354382	0.119506	1.0217	0.861006	1.16423	-0.94949	-0.538596	-1.20525	1.23334	0.0890804	-0.911138	-0.782665	-0.143559		0.722388	0.009873
Complement C4	Protein	-0.267544	0.239683	-0.840287	-1.24627	-0.490838	-0.56502	0.10825	0.782464	-0.924174	-0.505277	1.61626	0.000705625	-0.139957	0.917785	-1.3702	-0.161812		-0.795311	0.553433
Complement component C9	Protein	1.71409	1.66524	0.5052	1.18931	0.236369	1.67687	1.20542	1.74682	-2.07538	-0.563818	-0.80761	0.773671	0.867932	-0.692511	-0.966399	-0.507142		0.631382	-1.04331
Glutathione peroxidase 3	Protein	1.49758	1.31179	0.293542	0.717967	-0.67329	0.517773	0.102314	1.31542	-1.4069	0.801887	0.229597	0.253222	0.760615	-0.670713	-1.15014	-1.02626		0.462702	-0.952596
Haptoglobin	Protein	0.4663	-0.557198	0.379045	-1.38385	-0.618813	-0.116036	-0.941683	-1.34217	-0.370766	-0.188614	0.963358	1.18806	-0.205222	1.73179	0.029818	-0.380259		-0.193607	0.988013
Hemopexin	Protein	1.19016	0.357458	-0.0255853	-0.140395	-0.599695	0.300352	-1.41099	0.596927	0.0328372	0.0930283	0.973736	-0.871591	-0.196798	1.84408	-1.01823	-0.425685		0.651502	1.89938
Histidine triad nucleotide binding protein 2 (Predicted), isoform CRA_a	Protein	0.592621	0.464976	0.434404	-0.281356	-0.178837	-0.923688	-1.25468	1.52483	0.076254	1.01727	0.489423	-0.345644	-0.674491	1.33933	-0.416519	-1.19717		1.10368	2.18351
Ig gamma-2B chain C region	Protein	0.969083	1.49208	2.09465	0.723685	0.833113	0.576724	-0.321219	0.050925	-0.850706	1.10771	-1.65646	-1.16332	-0.0166592	-0.0341727	-0.886973	-0.710237		1.17166	0.00818962
Immunoglobulin heavy co	Protein	-0.133862	-1.30623	0.379443	-1.11957	-2.27747	-2.01963	-1.11593	-0.10885	-1.01466	0.792827	0.214903	-0.34557	-0.0572617	0.672662	-0.543998	0.743664		-0.478087	-0.996654
Inter-alpha-trypsin inhibitor heavy chain 2	Protein	1.63713	3.32281	0.0774157	1.37502	-1.50518	0.115255	-0.0997601	0.169064	-0.0798289	0.463702	-0.0317852	-0.630207	0.951705	0.769249	0.0949969	-0.733954		0.415666	-0.548125
Inter-alpha-trypsin inhibitor heavy chain 4	Protein	2.70386	2.19869	0.398502	0.605356	0.514091	1.16118	0.814874	1.08021	-0.779665	-0.898417	-0.940604	-1.0552	0.57489	-0.410299	-2.0926	0.322478		0.489556	0.319395
Inter-alpha-trypsin inhibitor heavy chain H3	Protein	1.51866	2.15542	0.632706	1.35766	0.448052	1.96359	1.40462	1.98999	-0.981473	-0.33011	-0.506609	0.165162	0.983293	-0.504446	-0.470048	-0.888956		0.359149	-0.644329
L-lactate dehydroge0se A chain	Protein	0.110459	0.510395	-0.799369	0.479953	0.698596	-0.086408	0.072666	-1.20255	-1.24755	0.226829	0.555642	0.394	0.0901743	-0.683612	-0.11303	-0.185244		0.196404	-2.13274
L-lactate dehydroge0se B chain	Protein	-0.416697	0.521342	0.746802	0.42035	1.08104	0.256243	0.711172	0.366116	-1.80098	0.730136	-0.57164	-0.248636	0.571917	-0.719518	0.168677	-0.137155		0.250604	-1.51525
Peroxiredoxin-1	Protein	0.226654	0.861104	0.894553	0.697784	1.00515	1.14472	0.642658	-1.21478	-0.657603	-1.75615	-1.16884	-1.36676	-3.11333	-1.00985	-0.820161	-1.34064		-0.340826	-1.18873
Peroxiredoxin-2	Protein	0.520789	0.700445	0.149642	0.208339	0.0524911	0.318426	-0.248848	-0.0138126	-0.886358	1.11321	0.0533506	0.253414	1.44218	-0.458078	-0.0888796	-0.318426		0.991383	-0.593926
Peroxiredoxin-4	Protein	0.64359	1.23557	0.894155	1.77405	1.44841	1.74031	0.739502	0.439222	-1.04393	-0.395111	-1.29206	0.00507195	0.129443	-1.47988	-0.735635	-0.999868		1.54192	-1.79783
Platelet factor 4	Protein	-0.441465	-0.159086	-1.77747	-1.5237	1.00158	0.0638272	-0.165367	0.592838	0.260149	1.12936	0.0804913	1.21581	1.31866	-1.144	1.27487	1.14352		-0.314862	-0.464283
Protein AMBP	Protein	1.57915	2.14995	0.31628	1.09953	-0.262653	1.11371	0.915793	2.39348	-0.58916	0.150963	0.375368	0.291461	1.39787	0.209111	-0.294745	-0.269562		0.247869	-0.194424
Serine (Or cysteine) protei0se inhibitor, clade A (Alpha-1 antiprotei0se, antitrypsin), member 4	Protein	1.62123	1.97116	0.168004	1.05081	0.0558422	1.18474	1.20387	1.53081	-1.6	0.890327	-0.584177	0.459322	-0.701064	-1.42728	-1.28332	-0.38209		0.415788	-0.659895
Serine protease inhibitor A3L	Protein	1.70481	1.96972	0.479766	0.304329	0.0639031	0.104833	0.0417232	1.11245	-0.430338	-2.43991	-0.535587	-0.469678	1.4453	0.294174	-1.27537	-0.617496		0.136151	0.450847
Serotransferrin	Protein	-0.0517516	-0.778786	0.117771	-0.233418	-1.3003	-0.0643607	-0.637056	-1.26003	0.63588	0.328686	0.891185	-0.329164	-0.263838	1.37664	-0.296206	-0.012663		-0.715038	1.49298
Serum albumin	Protein	1.24003	0.67244	0.523119	-0.00882005	-0.676131	-0.123557	-0.607562	0.121901	0.0660479	-0.615122	0.0487262	-1.70935	-1.32891	1.28742	-1.12417	-1.08947		0.165205	1.41327
Uncharacterized protein	Protein	-1.7698	-0.785684	-1.33357	-1.56679	-1.32768	-1.62763	-1.47803	-1.99979	0.521934	1.03697	-0.163285	0.777895	0.374555	-0.829255	0.667856	0.286367		-0.404167	0.203068
Vitronectin	Protein	-0.512814	0.434694	-0.775934	-0.28681	-0.664745	-0.832596	-1.04078	0.153737	-1.40477	-1.33652	-1.65433	-0.718346	-0.0501628	-1.3932	-0.606854	-0.884759		0.570072	0.313999
H4-II-E-C3_eGPF_AUC10h	eGFP	2563.03	1546.21	1222.28	1483.3	1509.07	1277.8	1457.31	1809.65	8419.24	8188.02	7389.09	2810.65	7394.76	8939.08	7109.79	4219.54		1301.77	4264.44
NRK-49F_eGFP_AUC10h	eGFP	1191.97	1026.83	1041.33	1113.2	1178.93	1057.11	1079.79	1220.79	1888.87	2862.46	2262.86	1170.13	1632.38	1924.95	2203.8	1253.52		1049.87	1412.64
Huh7_eGFP_AUC10h	eGFP	4275.88	2746.27	3275.53	7390.29	7835.06	3719.58	4236.69	7975.13	19912.6	18327.1	21813.1	6782.76	13595.9	26336.3	20115.1	10173.2		3637.33	12643.1
McA-RH-7777_EGFP_AUC10h	eGFP	2503.73	1977.32	2134.99	3145.94	3168.67	1892.38	2723.1	4824.43	25417.8	20671.2	15897.3	7941.74	12530.4	20766	12515.8	8911.31		2155.51	12005.6

## Sheet: by animal
	Coronal component	LPC 16:0	LPC 16:1	LPC 18:0	LPC 18:1	LPC 18:2	LPC 20:0	LPC 20:1	LPC 20:3	LPC 20:4	LPC 22:6	PC 32:0	PC 32:1	PC 34:0	PC 34:1	PC 34:2	PC 34:3	PC 36:1	PC 36:2	PC 36:3	PC 36:4	PC 36:5	PC 38:2	PC 38:3	PC 38:4	PC 38:5	PC 38:6	PC 40:4	PC 40:5	PC 40:6	PC 40:7	PC 40:8	Apolipoprotein C-II	Actin, cytoplasmic 2	Alpha-1-inhibitor 3	Alpha-1-macroglobulin	Alpha-2-HS-glycoprotein	Alpha-actinin-4	Alpha-enolase	Apolipoprotein A-I	Apolipoprotein A-II	Apolipoprotein A-IV	Apolipoprotein B-100	Apolipoprotein C-I	Apolipoprotein C-III	Apolipoprotein C-IV	Apolipoprotein E	Apolipoprotein M	Apolipoprotein N
Corona	Plasma	Lipid	Lipid	Lipid	Lipid	Lipid	Lipid	Lipid	Lipid	Lipid	Lipid	Lipid	Lipid	Lipid	Lipid	Lipid	Lipid	Lipid	Lipid	Lipid	Lipid	Lipid	Lipid	Lipid	Lipid	Lipid	Lipid	Lipid	Lipid	Lipid	Lipid	Lipid	Protein	Protein	Protein	Protein	Protein	Protein	Protein	Protein	Protein	Protein	Protein	Protein	Protein	Protein	Protein	Protein	Protein
1	Lean	-0.242649	-0.615919	-0.712655	-0.421135	-0.149207	1.51947	0.220566	-0.761152	-0.670583	-0.548461	-0.578569	-0.565666	-0.549747	-0.551379	-0.397937	-0.430761	-0.602175	-0.593956	-0.611992	-0.611698	-0.536564	-0.581563	-0.62928	-0.617447	-0.608603	-0.662934	-0.621133	-0.592999	-0.64201	-0.639143	-0.591278	-1.26972	1.22209	0.400393	0.492223	1.45751	0.239481	-0.37885	-0.334677	-1.06506	-0.083361	-0.702456	-1.27523	-1.33678	-1.21411	0.18742	-1.07836	0.110854
2	Lean	-0.382249	-0.430714	-0.654545	-0.549687	-0.462664	0.326941	0.564552	-0.799305	-0.830856	-0.765509	-0.542307	-0.581396	-0.502722	-0.529339	-0.426902	-0.845258	-0.58429	-0.556665	-0.621924	-0.68083	-0.733159	-0.62765	-0.634006	-0.638959	-0.703025	-0.692617	-0.616476	-0.594824	-0.644149	-0.791501	-0.719797	-1.72859	2.69865	0.372157	-0.191732	1.25042	0.617589	0.198439	0.587371	-1.72583	0.221648	-0.961023	-1.66618	-1.41171	-1.04306	-0.223892	-0.740731	-0.150193
3	Lean	-0.197055	-0.825925	-0.564648	-0.511846	-0.517392	1.82068	2.14538	-0.79887	-0.754041	-0.768604	-0.605352	-0.75057	-0.571319	-0.566838	-0.37402	-0.976277	-0.607518	-0.609891	-0.623584	-0.587143	-0.745703	-0.638368	-0.635227	-0.610492	-0.603996	-0.637209	-0.570413	-0.56946	-0.639586	-0.78791	-0.677798	-1.7649	-0.164375	-0.105557	0.105157	0.826276	0.27173	-0.101008	1.31583	-1.52792	0.838034	-0.763615	-0.517505	-1.36599	-1.36473	0.510862	-1.08036	-1.70596
4	Lean	0.0062647	-0.807016	-0.548877	-0.405987	-0.139166	2.48903	1.30184	-0.702537	-0.683082	-0.734933	-0.505827	-0.660081	-0.624484	-0.567136	-0.301199	-0.557156	-0.625502	-0.591458	-0.620193	-0.60325	-0.612711	-0.634756	-0.643105	-0.622684	-0.64743	-0.661779	-0.619484	-0.593122	-0.650551	-0.771485	-0.665759	-0.801705	1.17322	0.341448	-0.298201	1.29849	0.670115	0.179909	0.608163	-1.07424	0.253054	-0.694091	0.133325	-0.947942	-1.13425	1.09093	-1.114	-0.0422496
5	Lean	-0.0782888	-0.448498	-0.543942	-0.213925	0.0274839	1.69345	1.11788	-0.705864	-0.635328	-0.654761	-0.608216	-0.665341	-0.635296	-0.637497	-0.440803	-0.524678	-0.640036	-0.643345	-0.638297	-0.605061	-0.702526	-0.595375	-0.647822	-0.631022	-0.640495	-0.66201	-0.609513	-0.590563	-0.645212	-0.752428	-0.65842	-0.789981	-0.254255	-0.207346	-0.874379	0.267403	0.528896	-0.0451471	-1.69037	-1.29176	-0.227915	-0.559871	-0.108973	-0.619513	-0.691457	1.23146	-1.10054	-1.45787
6	Lean	-0.517492	-0.99066	-0.792434	-0.618468	-0.394868	0.43129	0.557096	-0.794473	-0.689916	-0.701235	-0.595789	-0.735844	-0.637641	-0.65694	-0.373415	-0.51744	-0.665783	-0.657751	-0.651477	-0.590065	-0.716239	-0.673199	-0.659193	-0.626608	-0.620435	-0.64557	-0.595975	-0.597104	-0.646116	-0.745496	-0.650171	-1.2061	0.222657	-0.477979	-0.672107	1.0629	-0.394162	-0.334332	0.292255	-1.63383	0.687263	-0.967122	-0.69494	-0.771447	-1.66029	1.4728	-1.36546	-1.16622
7	Lean	-0.524798	-0.688897	-0.666248	-0.337251	-0.389868	-0.361466	0.0574463	-0.683198	-0.708255	-0.618441	-0.469189	-0.431658	-0.473583	-0.441211	-0.339859	-0.534023	-0.502572	-0.453304	-0.529776	-0.518886	-0.624764	-0.453487	-0.556782	-0.524035	-0.565824	-0.597657	-0.499913	-0.518132	-0.57323	-0.605355	-0.623039	-0.460498	1.6558	-0.493581	-1.32528	0.430067	-0.373002	-0.281711	0.247397	-0.503918	1.10684	0.12402	0.407146	-0.315451	-0.665774	0.775874	-0.656165	-0.67049
8	Lean	-0.0255362	-0.402653	-0.584027	-0.17102	-0.0583263	1.24785	0.778245	-0.64826	-0.53737	-0.632509	-0.4618	-0.573787	-0.560493	-0.501152	-0.115962	-0.439375	-0.576758	-0.516618	-0.536727	-0.520521	-0.61544	-0.609097	-0.618774	-0.579899	-0.55944	-0.579962	-0.587748	-0.574342	-0.607307	-0.623656	-0.506125	-0.383897	0.58198	0.357657	-0.965054	1.78074	-0.0201439	0.463393	-0.386149	-0.291421	0.509942	-0.872759	-1.48538	-1.02379	-1.30012	-0.497634	-0.807558	1.10473
9	Obese	1.5386	2.27646	1.39357	2.30935	2.22018	0.621473	1.26652	1.90367	1.25566	1.68546	0.941481	1.46583	1.33759	1.37251	1.07902	1.7774	1.40341	1.17532	1.05995	0.745463	1.31266	1.01563	0.945415	0.673448	0.814061	0.891932	0.650483	0.578281	0.82202	1.46141	1.1177	1.56098	-1.21988	2.07258	2.8614	-1.60355	-1.02187	-0.802523	0.103702	1.52137	-0.710743	0.938496	1.10764	1.7018	1.20303	0.0412742	1.1378	0.485424
10	Obese	0.446896	0.749614	1.17951	0.813204	0.814812	0.908571	0.905631	0.876689	0.323165	0.634392	-0.0514782	0.508934	0.386534	0.441675	0.29261	0.655345	0.771503	0.733173	0.611008	0.218741	0.577939	0.725941	0.662403	0.428953	0.568054	0.591251	0.306269	0.235657	0.617339	1.48538	0.525526	1.3693	-0.94854	-0.0630053	0.212108	-0.0150819	0.531593	1.05824	0.171111	1.85651	-0.572463	0.993734	0.0114203	0.595423	0.493437	-1.4268	0.67326	-0.500785
11	Obese	0.393348	-0.118551	0.977821	-0.0864704	-0.180596	0.225856	-0.467223	0.205529	0.0649381	0.0128483	0.511205	0.442781	0.455882	0.401636	0.0808171	-0.140344	0.197663	0.0983064	0.199846	0.133931	0.155891	0.068112	0.0799102	0.00577609	0.0702115	0.0739458	-0.00251305	-0.0161683	-0.0290855	-0.0346086	-0.230881	0.93932	-0.547126	0.927796	0.311117	-0.946984	0.230502	1.51745	0.708769	1.71194	-0.164488	1.48249	0.339406	0.939609	1.11563	-2.12956	1.80733	1.58942
12	Obese	3.84531	3.13522	3.01941	3.61604	3.82507	1.93211	1.79361	3.26754	3.78651	3.22951	-0.0398986	0.161943	-0.0965958	-0.0576319	-0.083469	-0.257502	-0.0740151	0.0275155	0.00335891	-0.147535	-0.138661	0.0159875	-0.0143096	-0.169665	-0.204451	-0.117267	-0.0534113	-0.111068	-0.0360287	-0.206129	-0.279086	-0.211161	0.297767	-0.238752	-0.0901302	-1.3592	0.741394	1.03264	0.839256	0.439431	1.42768	-0.554579	-1.80998	-0.141124	-0.334387	-0.963988	0.213357	0.0963373
13	Obese	-0.218513	-0.118001	0.304904	-0.310713	-0.335449	-0.929185	-1.09697	0.0970511	-0.157346	0.0813741	4.15225	4.03207	4.15497	4.2632	4.45833	3.52621	4.20218	4.09096	4.06454	4.06107	3.59638	4.10666	4.00717	3.94913	3.95415	3.9354	3.90646	4.10545	3.82308	3.06947	3.21955	0.646177	-0.906748	-1.7072	-1.79253	-0.528694	1.46815	1.19885	-0.24218	0.802246	1.42596	-0.00932285	-1.19486	0.124787	0.47735	-0.0406174	-0.391655	0.398373
14	Obese	2.01695	1.31634	1.94028	1.29867	1.66718	0.754611	1.01163	1.848	1.64109	2.29681	1.93368	1.71823	1.87216	1.74693	2.0718	1.81933	1.89078	2.34774	2.27893	2.42184	2.10319	2.40238	2.5256	2.74278	2.50565	2.31105	2.97771	2.81779	2.77734	2.42891	2.9223	1.57718	-1.26744	1.11859	1.24918	-0.234666	-1.37763	-0.152866	1.54309	1.03919	-1.9186	0.761665	0.6235	1.12341	1.21026	-1.35362	1.44775	0.618875
15	Obese	0.591667	0.694321	1.08069	0.550202	-0.327297	0.00487883	-0.255963	0.356839	0.67725	0.19098	0.52916	0.598853	0.623568	0.513453	0.152399	0.461031	0.511153	0.410033	0.5309	0.684579	0.736698	0.539853	0.586201	0.753023	0.806797	0.844554	0.642212	0.611893	0.759724	1.08421	0.64688	1.64197	0.349322	-0.340181	0.453367	-2.18835	0.532914	0.967106	0.292428	1.05669	-1.64314	0.915372	0.716096	0.997267	1.40995	0.365649	1.33475	1.91139
16	Obese	0.893049	0.914708	1.16623	0.807578	0.611841	-0.404909	-0.214815	0.741104	0.993563	0.673186	1.32574	1.08128	1.08645	1.00531	0.849274	0.60842	0.792897	0.773883	0.94837	1.11105	1.04886	0.67414	0.7492	0.863904	0.900866	1.03135	0.710322	0.640481	0.773118	0.665084	0.568428	0.59179	-0.532788	-0.747798	-0.0761184	-1.07726	0.275903	0.372788	1.60628	0.812882	0.428096	0.532245	0.600631	0.727782	0.523361	0.049018	0.780861	1.82454
LP	Lean	-0.537685	-0.833467	-0.738097	-0.670462	-0.31312	0.496943	0.756569	-0.73943	-0.71193	-0.621538	-0.510617	-0.658888	-0.611422	-0.576826	-0.441793	-0.742828	-0.613601	-0.597338	-0.629163	-0.613126	-0.666019	-0.638222	-0.639005	-0.621748	-0.635316	-0.681234	-0.602293	-0.590732	-0.653308	-0.668932	-0.671602	-0.927324	0.628002	-0.381906	-0.930844	0.358055	-0.0585516	0.587572	0.766042	-1.51909	1.1777	-0.496059	-1.20081	-1.18379	-0.877532	0.423569	-0.461526	0.148735
OP	Obese	1.11696	1.24726	1.56349	1.69016	1.56817	0.238528	0.794922	1.58122	1.57524	2.04307	1.91908	1.64816	1.59967	1.5852	1.56887	1.46017	1.46147	1.45742	1.51164	1.45242	1.53901	1.31426	1.38719	1.35836	1.40807	1.43623	1.3168	1.22168	1.41074	1.46354	0.975128	0.840572	-0.99154	0.516441	-0.0145468	-0.508203	-1.05328	-0.914464	1.23786	0.516043	0.49523	1.12993	0.667901	0.837212	1.14515	-0.260579	1.13343	-0.567957
[truncated: 35 more columns]
